# Supplementary material for: Metal-free regioselective C–H amination for the synthesis of pyrazole-containing 2H-indazoles
Source: Royal Society of Chemistry journal article supplement (doi:10.1039/d0ob02485f), 2021-01-01

**Supporting Information**

**Metal-free regioselective C-H amination for the synthesis of  
pyrazole-containing 2*H*-Indazoles**

Kai Wang,<sup>a</sup> Tingting Wei,<sup>b</sup> Yujia Zhang,<sup>b</sup> Jiahao Hou,<sup>b</sup> Renren Bai,<sup>a</sup> and Yuanyuan Xie<sup>a,b\*</sup>

<sup>a</sup> Collaborative Innovation Center of Yangtze River Delta Region Green Pharmaceuticals, Zhejiang University of Technology, Hangzhou, China.

<sup>b</sup> College of Pharmaceutical Sciences, Zhejiang University of Technology, Hangzhou, China.

Email: xyy@zjut.edu.cn; Fax: (+86)571-88320878.

**Table of Contents**

**<sup>1</sup>H, <sup>13</sup>C and <sup>19</sup>F NMR spectra of the products.....2**

## 4. $^1\text{H}$ and $^{13}\text{C}$ NMR spectra of the products

3a  $^1\text{H}$  NMR

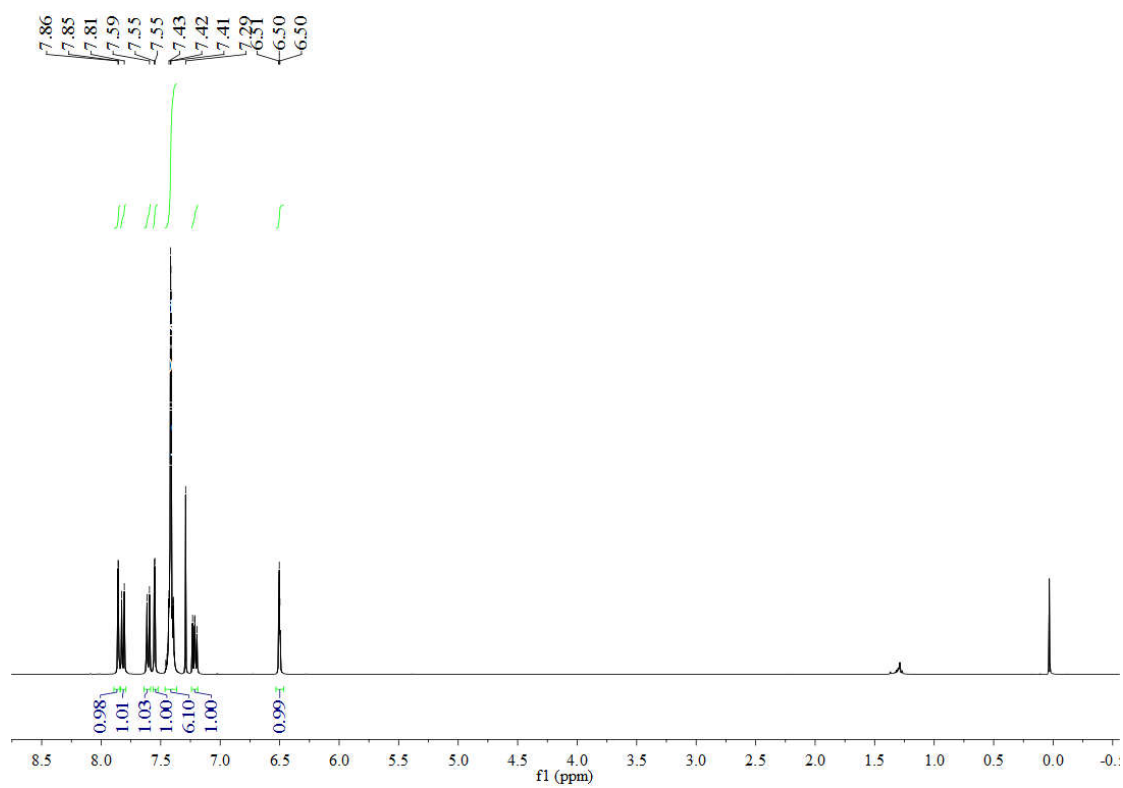

3a  $^{13}\text{C}$  NMR

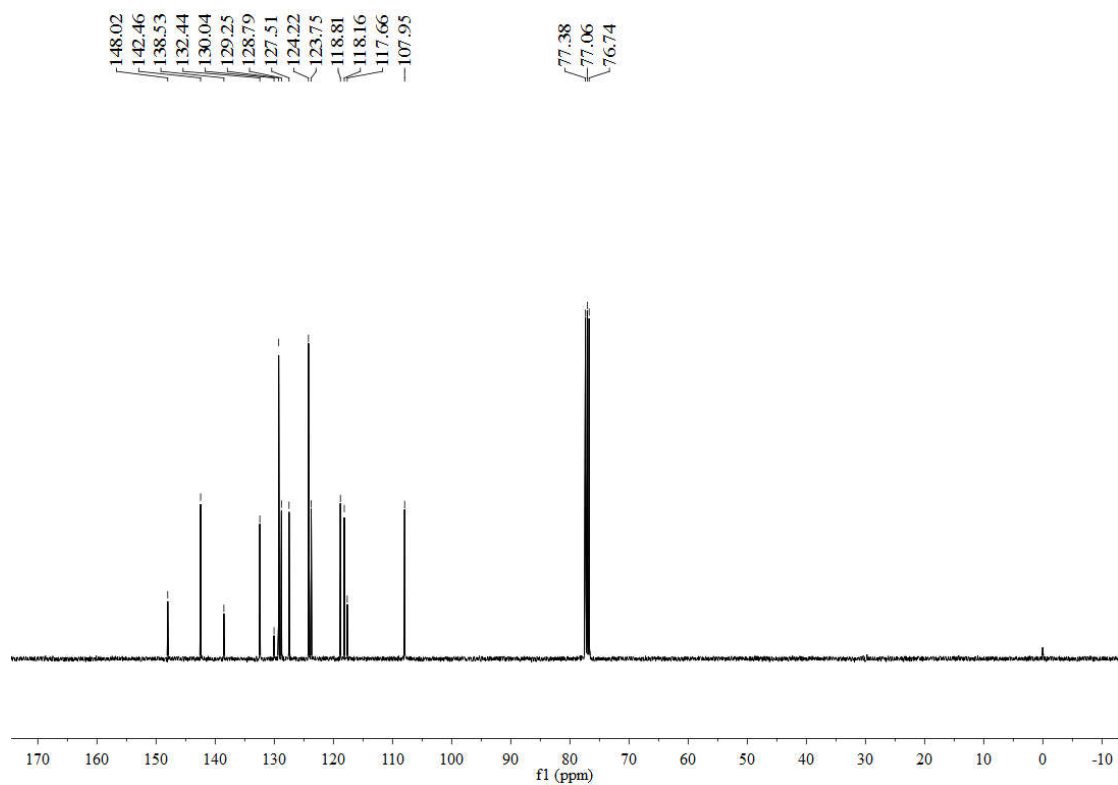

### 3b <sup>1</sup>H NMR

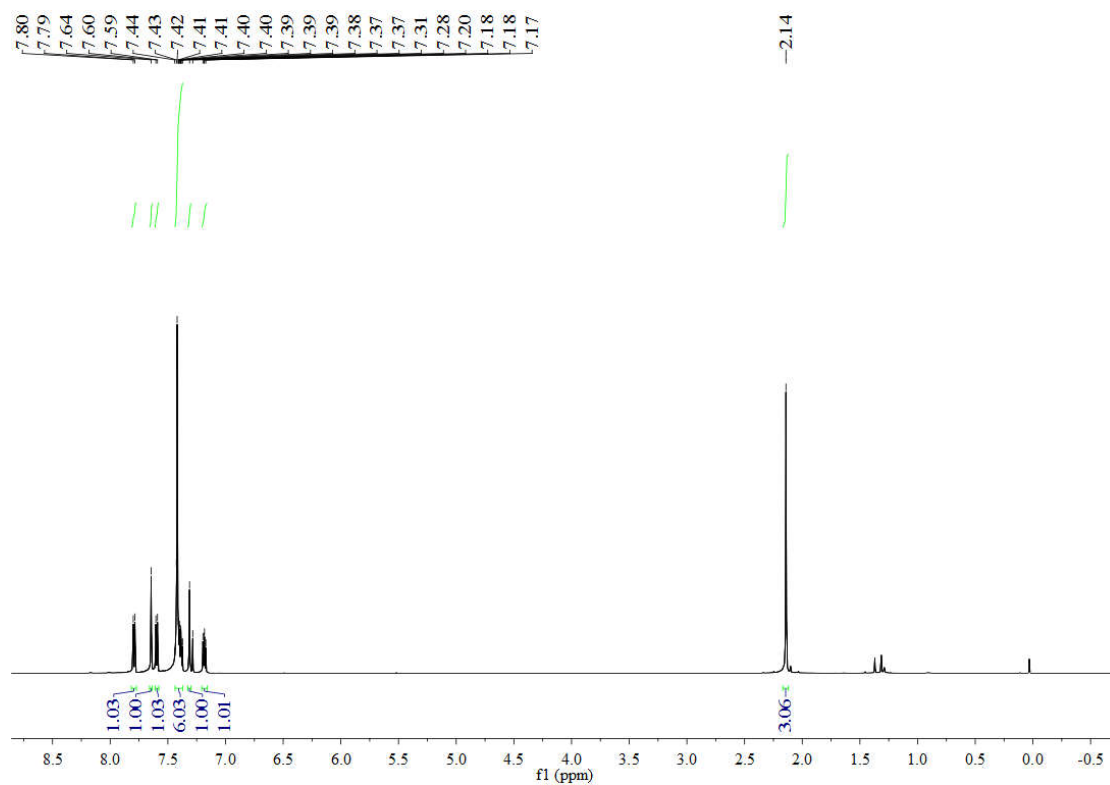

### 3b <sup>13</sup>C NMR

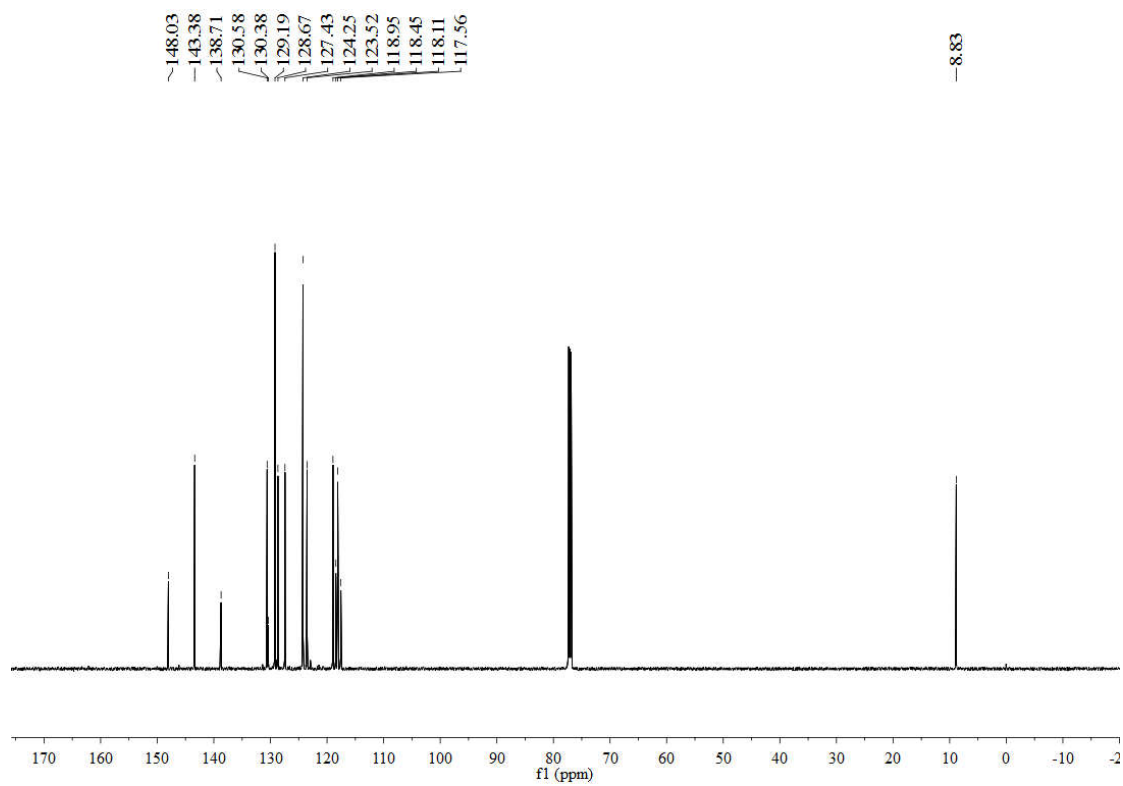

### 3c <sup>1</sup>H NMR

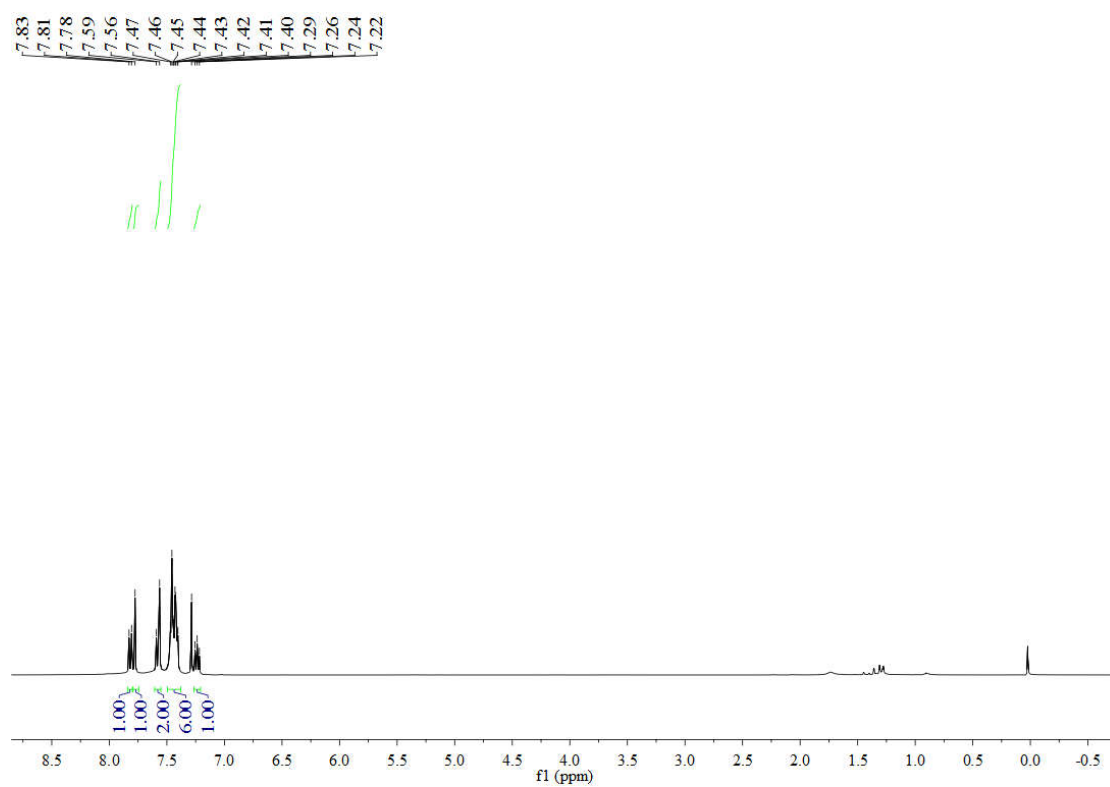

### 3c <sup>13</sup>C NMR

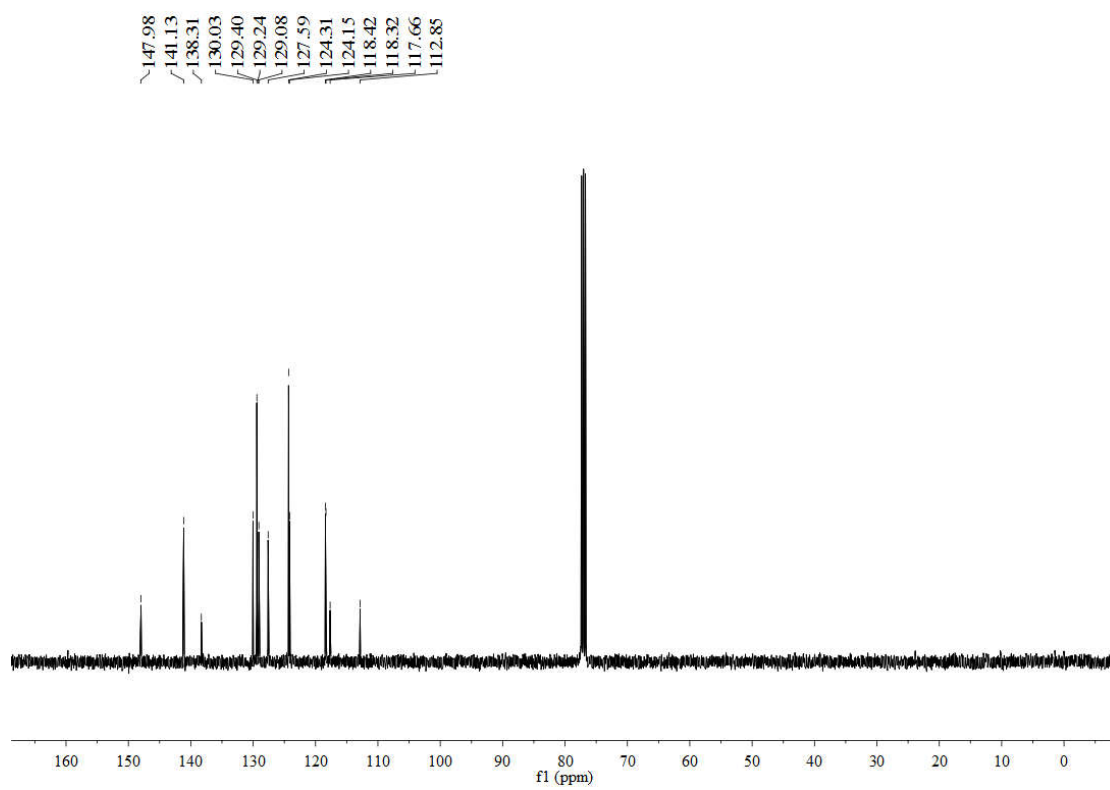

3d <sup>1</sup>H NMR

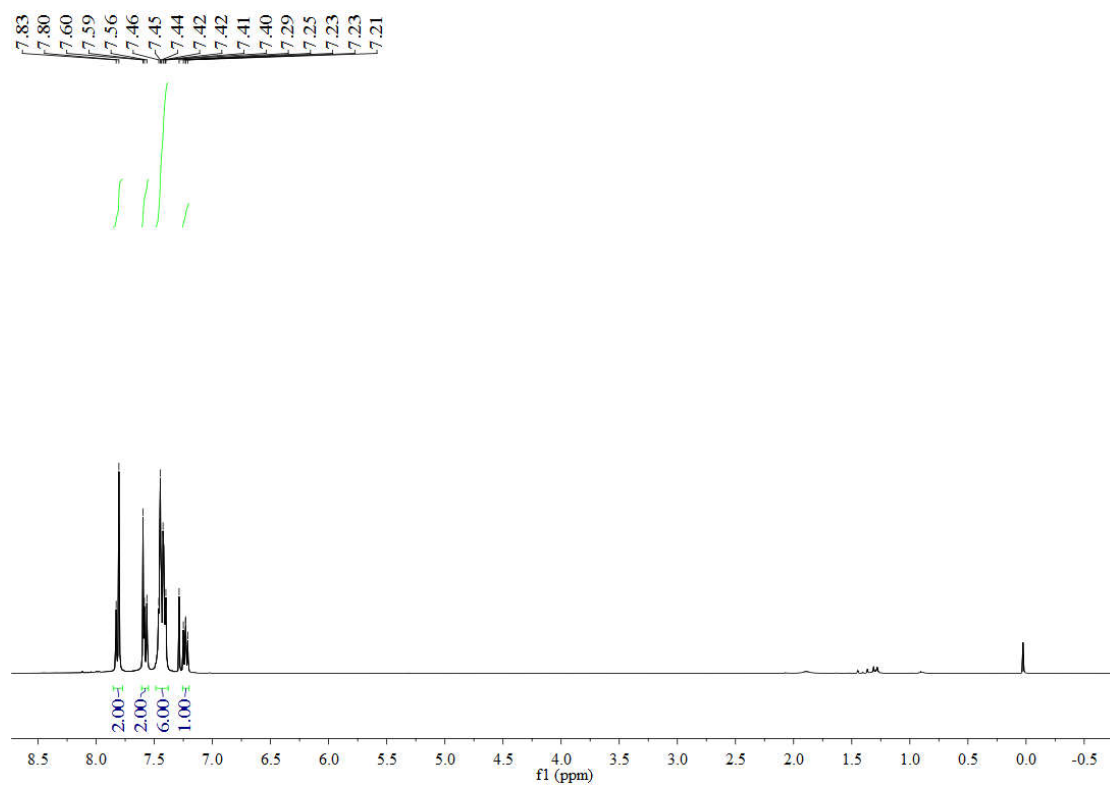

3d <sup>13</sup>C NMR

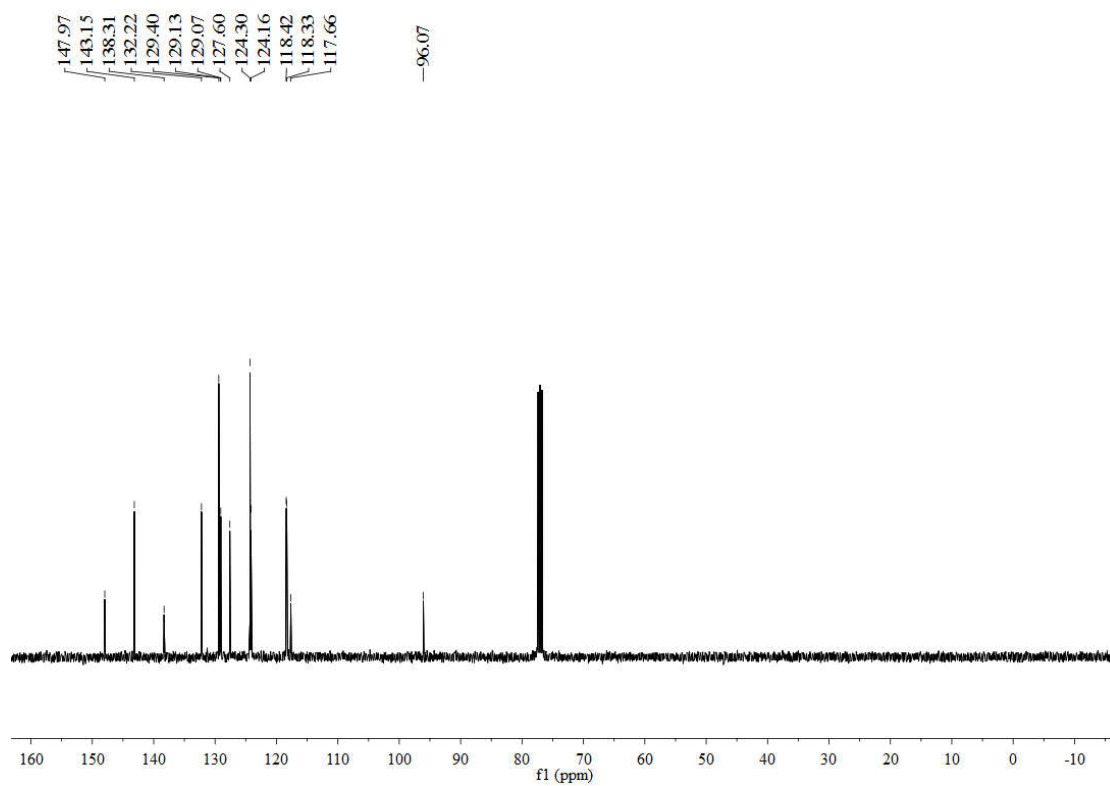

3e <sup>1</sup>H NMR

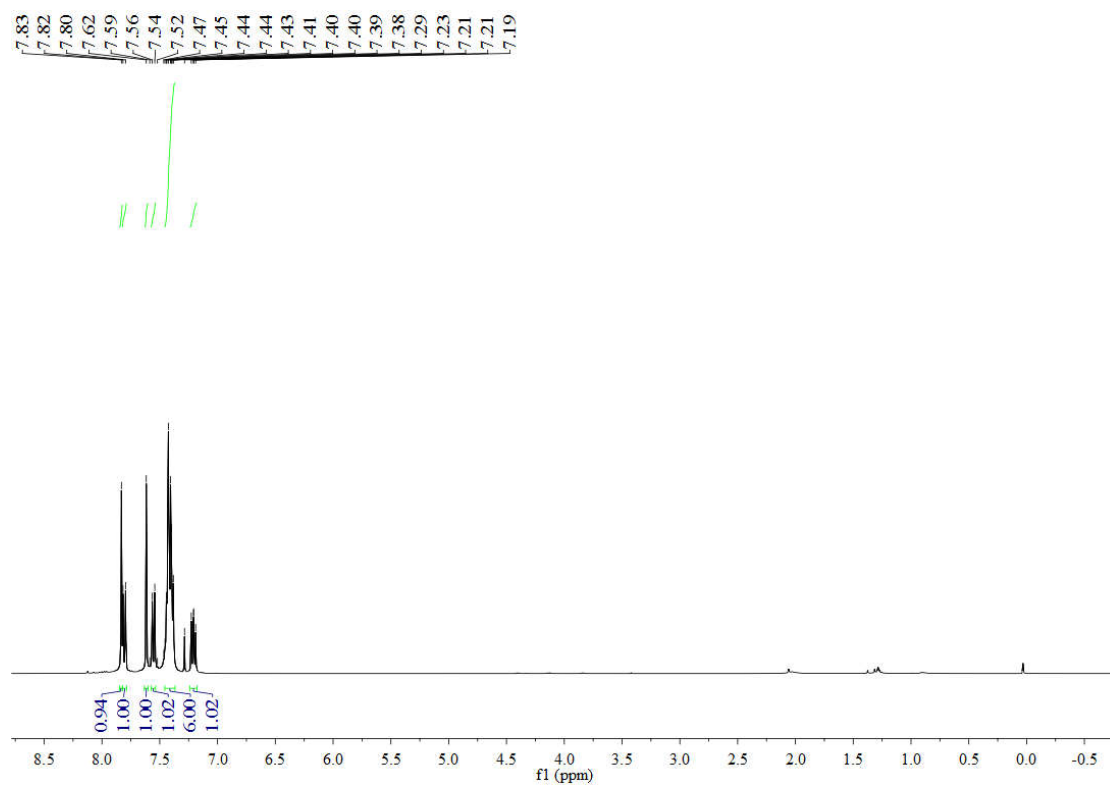

3e <sup>13</sup>C NMR

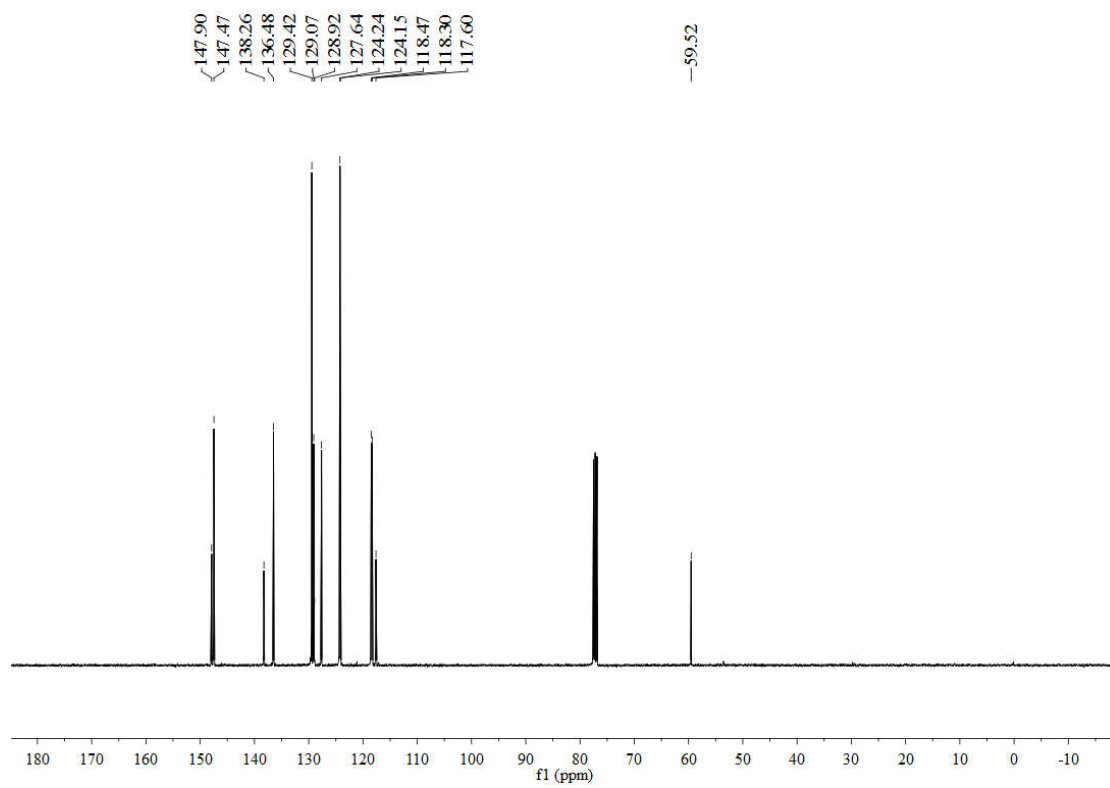

### 3g <sup>1</sup>H NMR

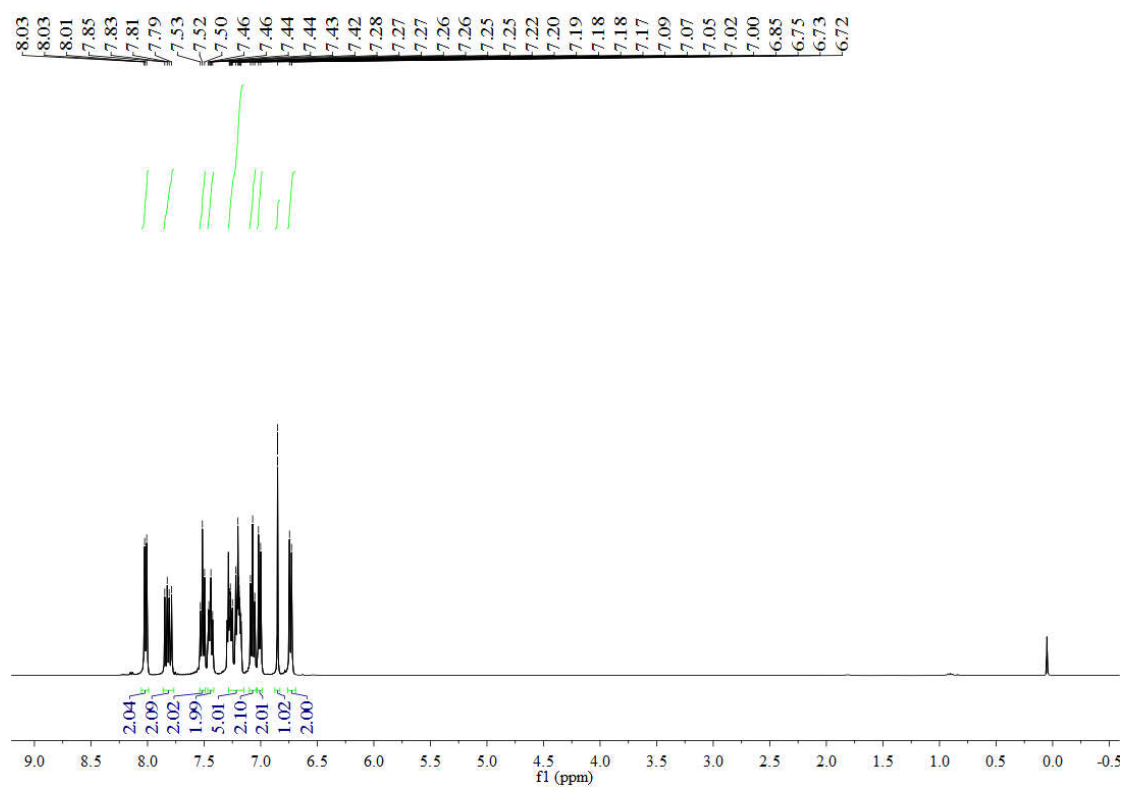

### 3g <sup>13</sup>C NMR

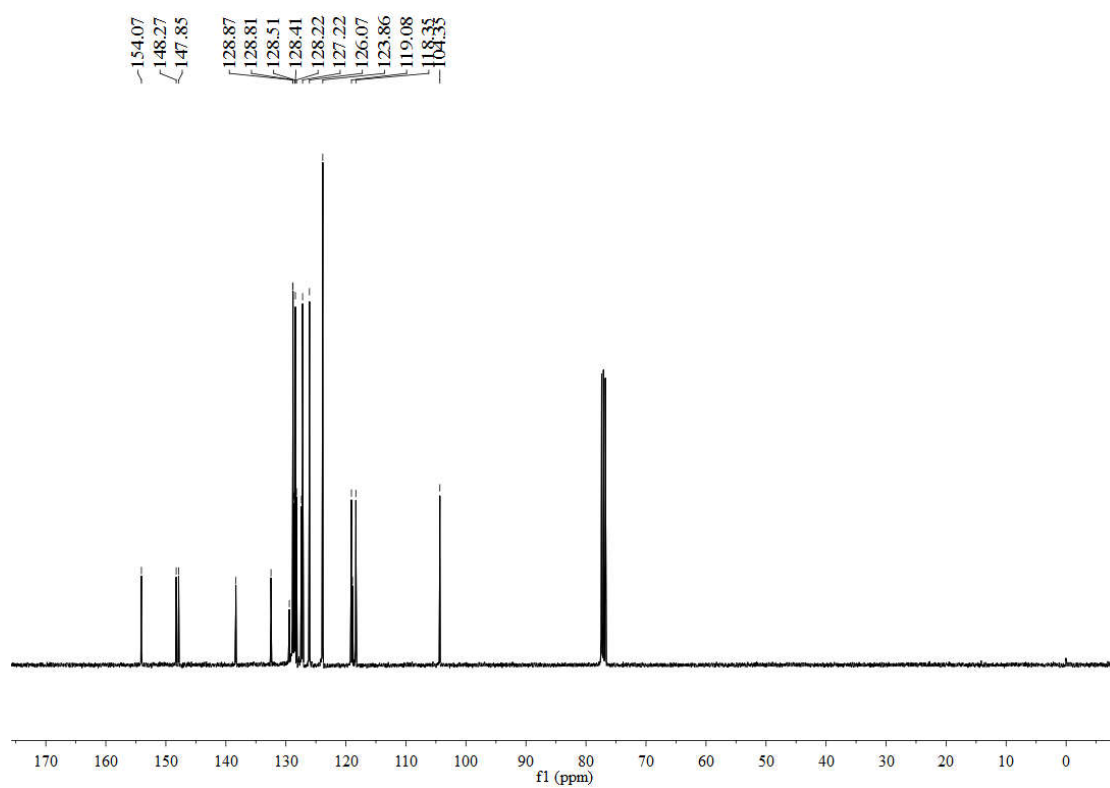

### 3h <sup>1</sup>H NMR

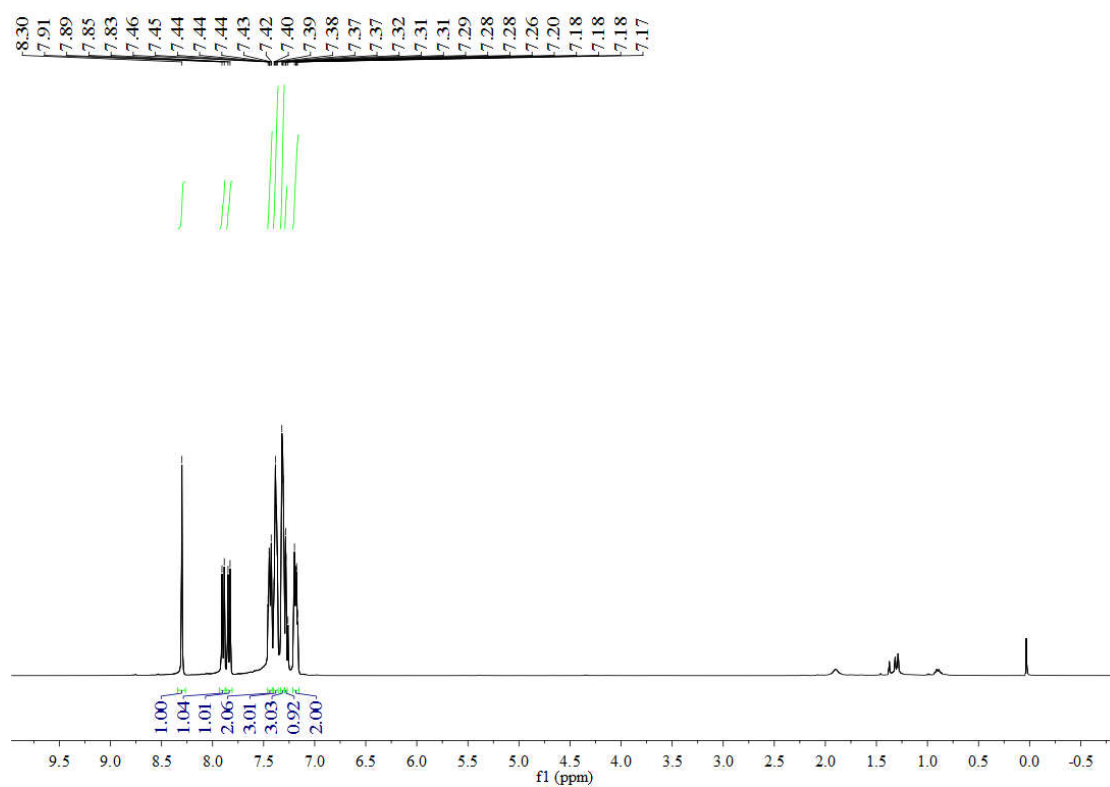

### 3h <sup>13</sup>C NMR

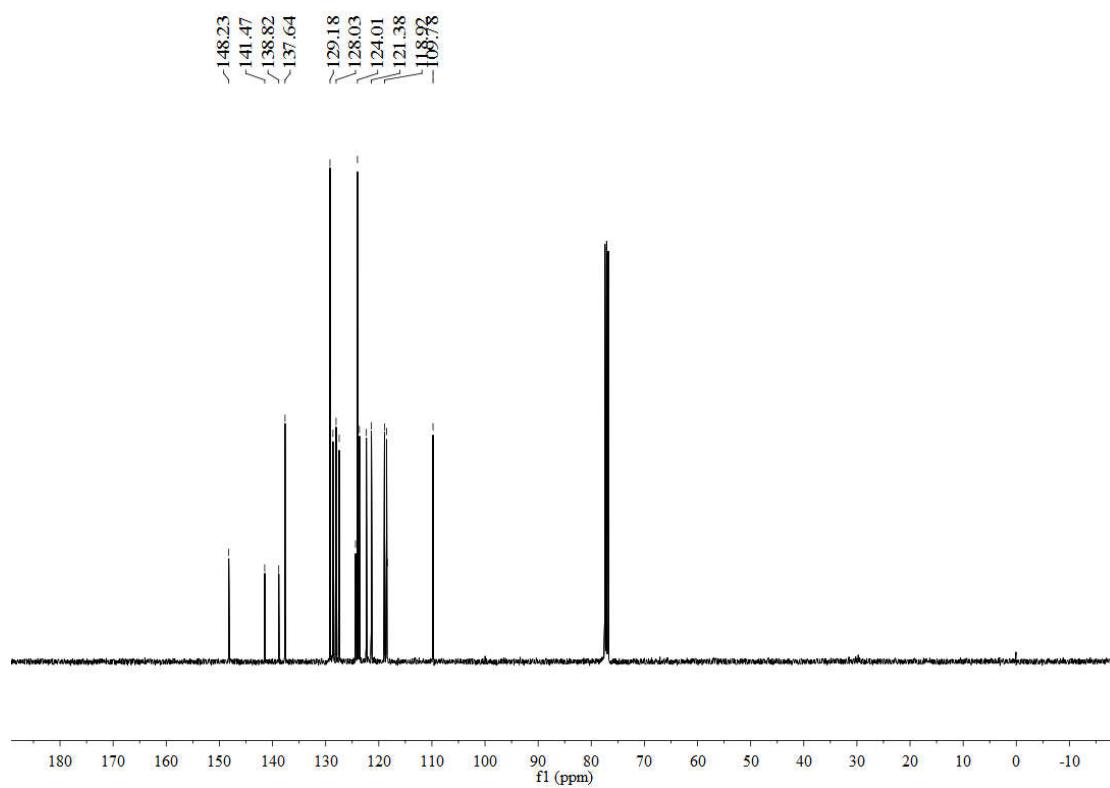



### 3i <sup>1</sup>H NMR

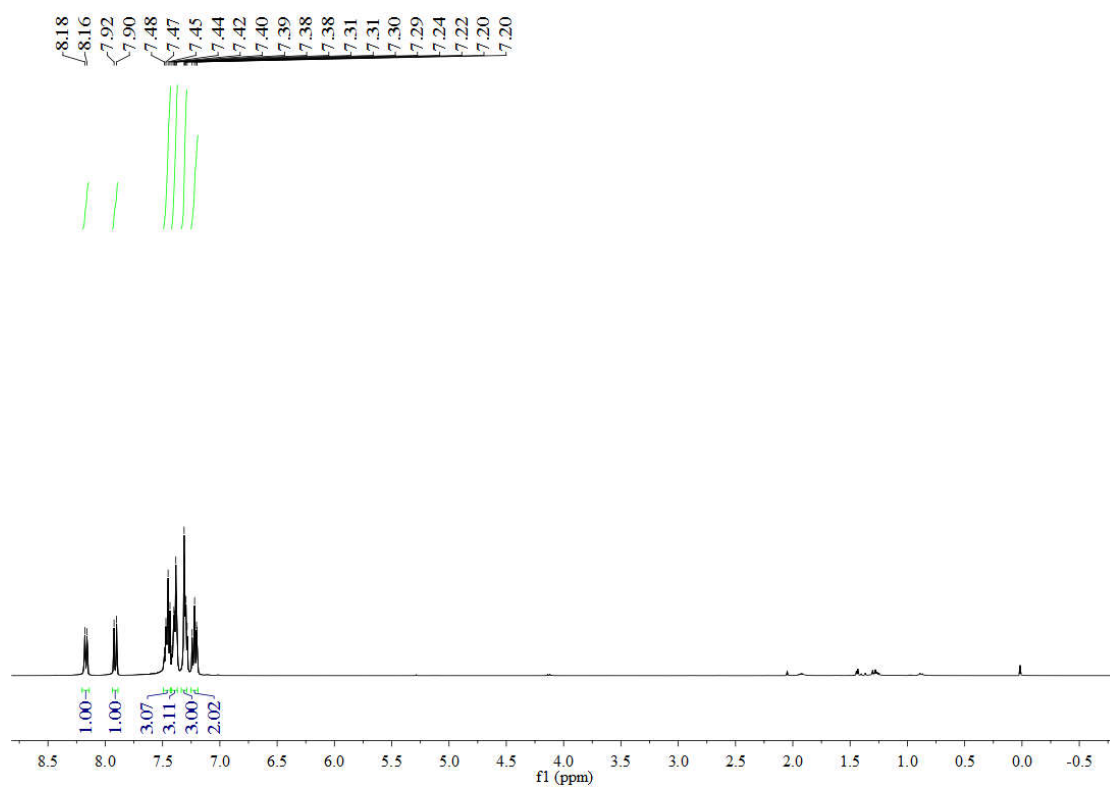

### 3i <sup>13</sup>C NMR

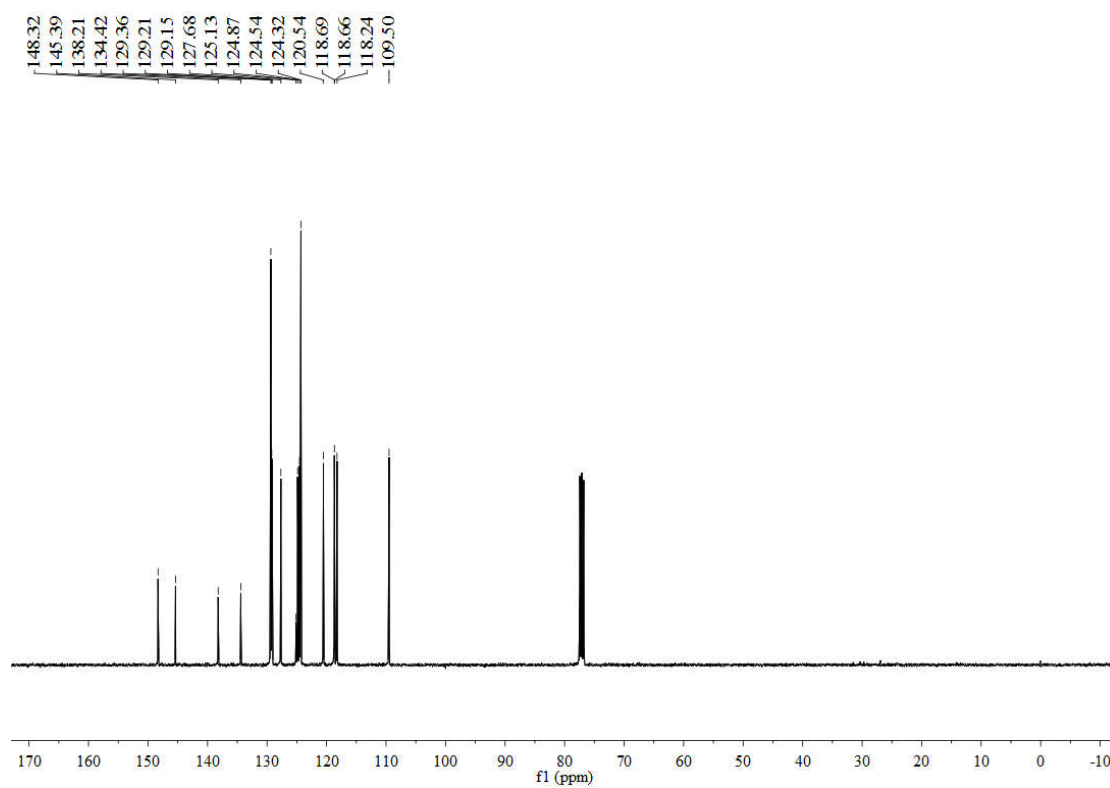

### 3k <sup>1</sup>H NMR

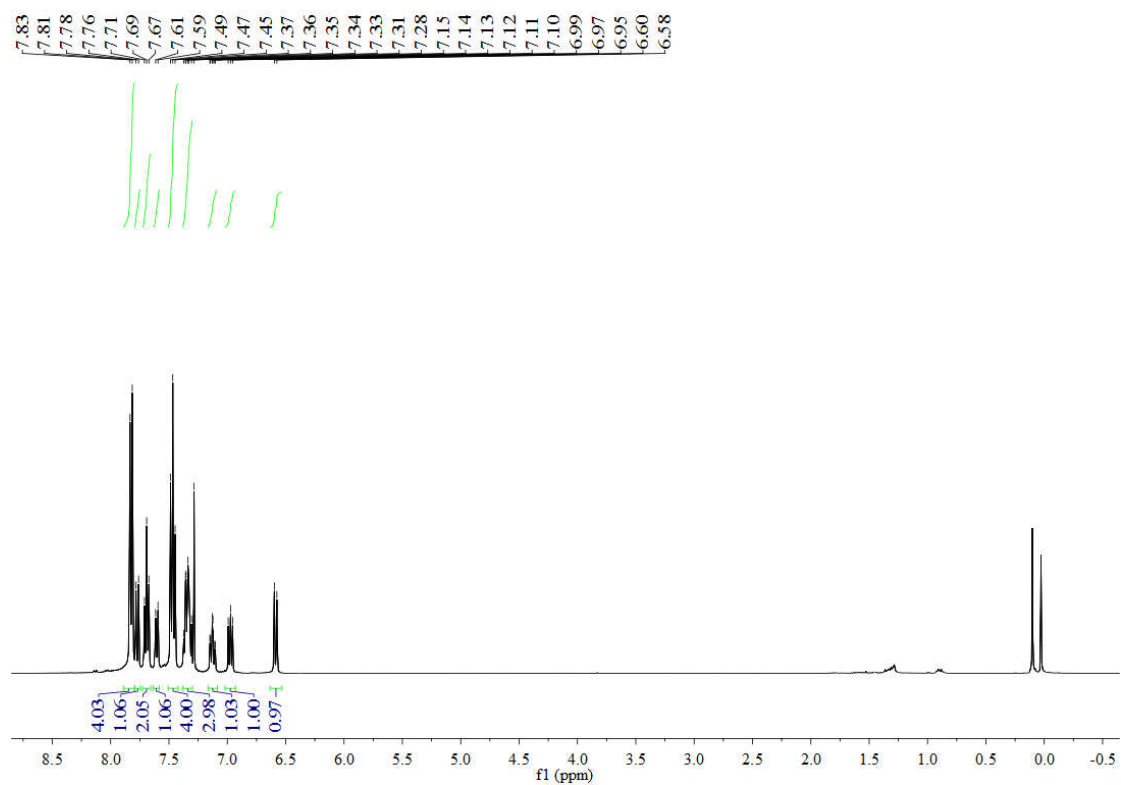

### 3k <sup>13</sup>C NMR

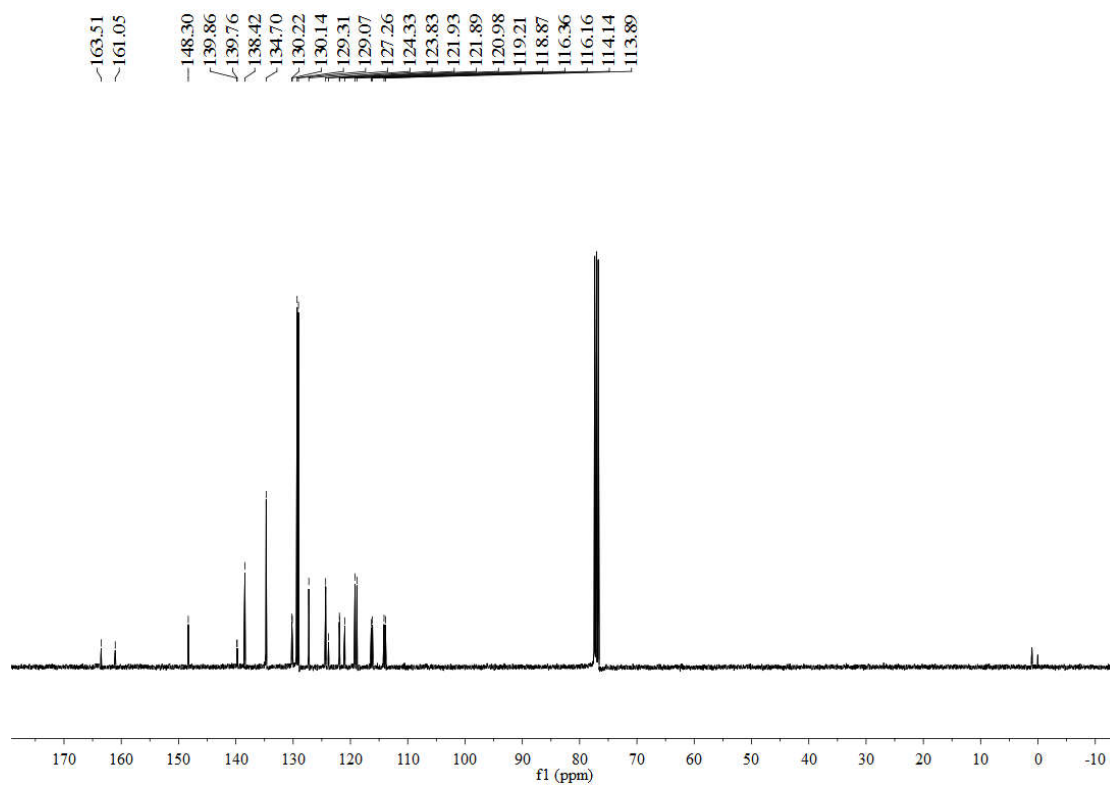

3k  $^{19}\text{F}$  NMR

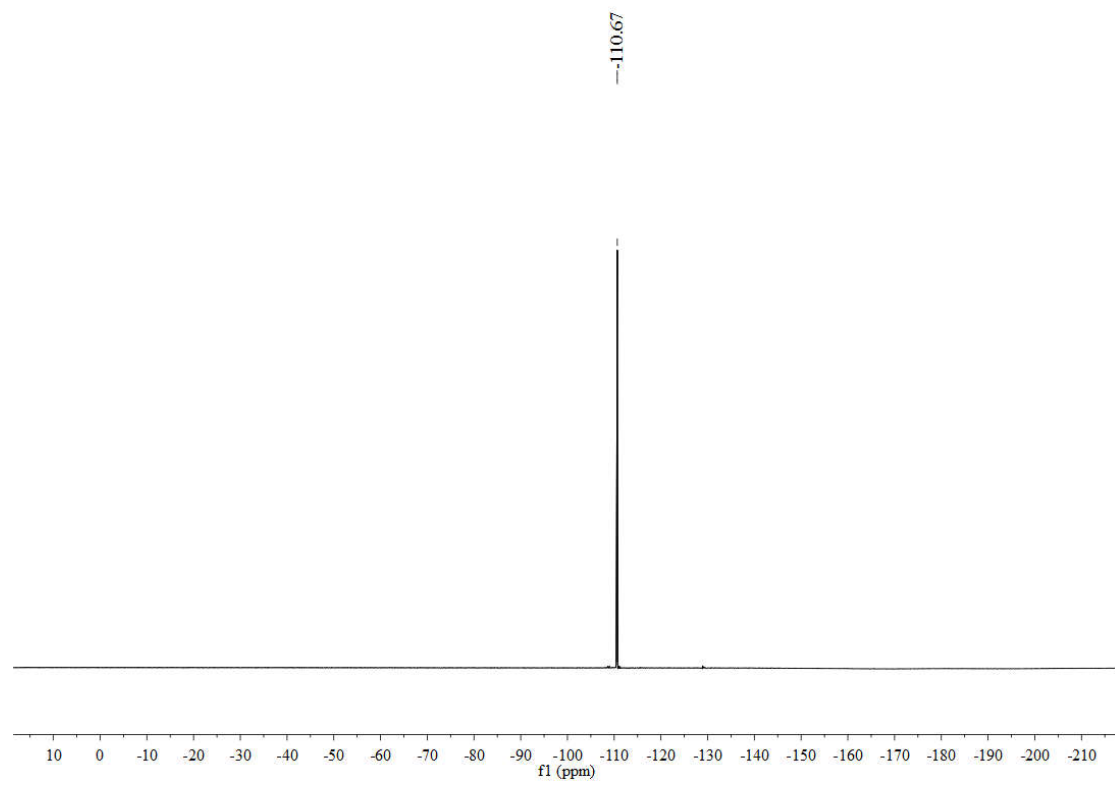

4aa <sup>1</sup>H NMR

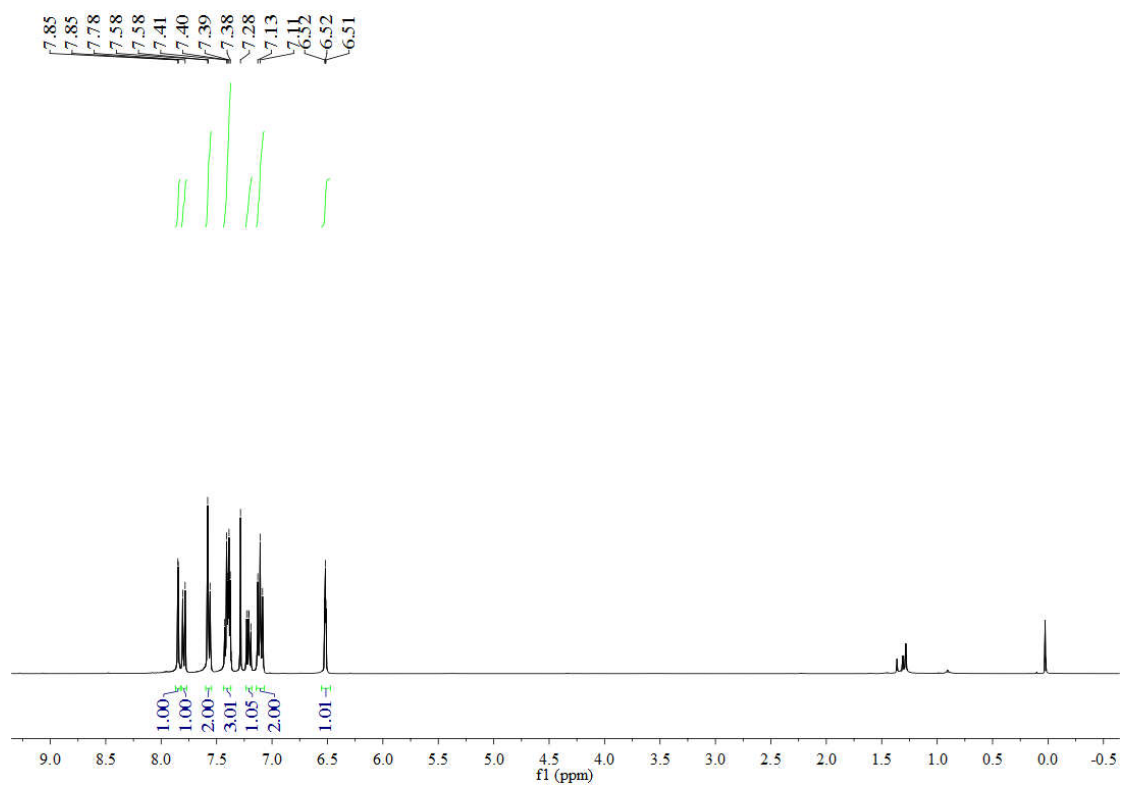

4aa <sup>13</sup>C NMR

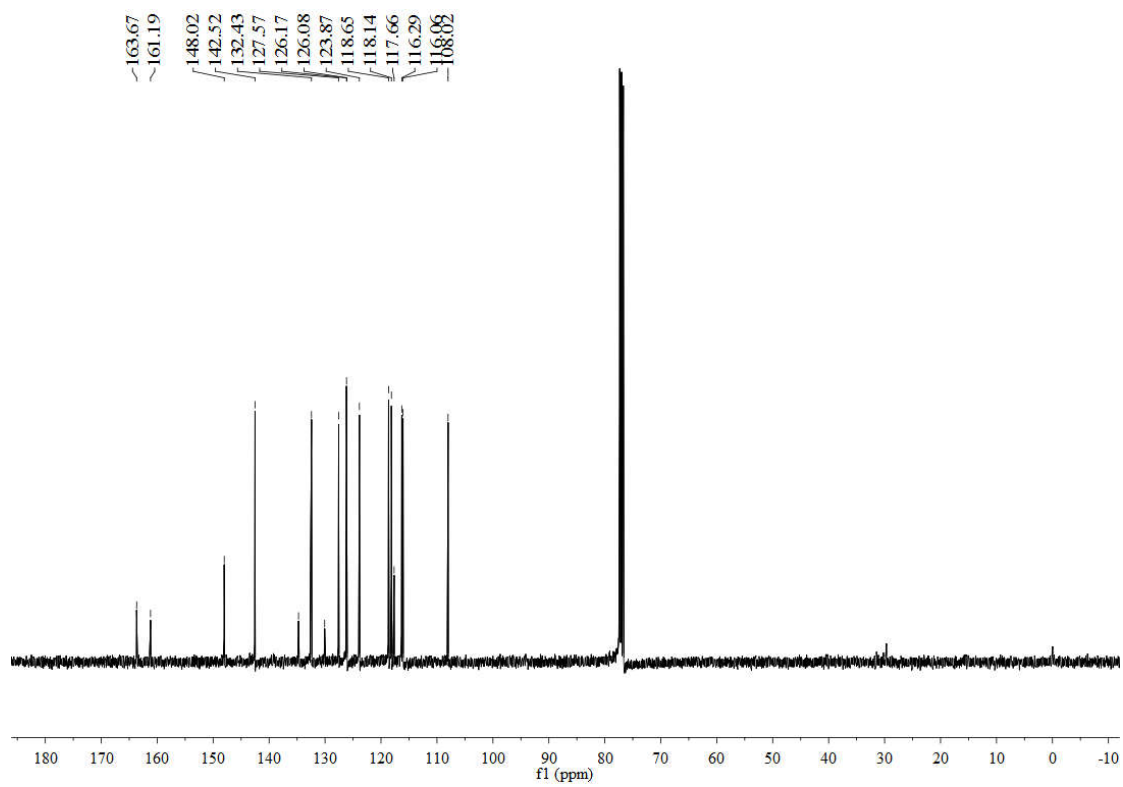

4aa <sup>19</sup>F NMR

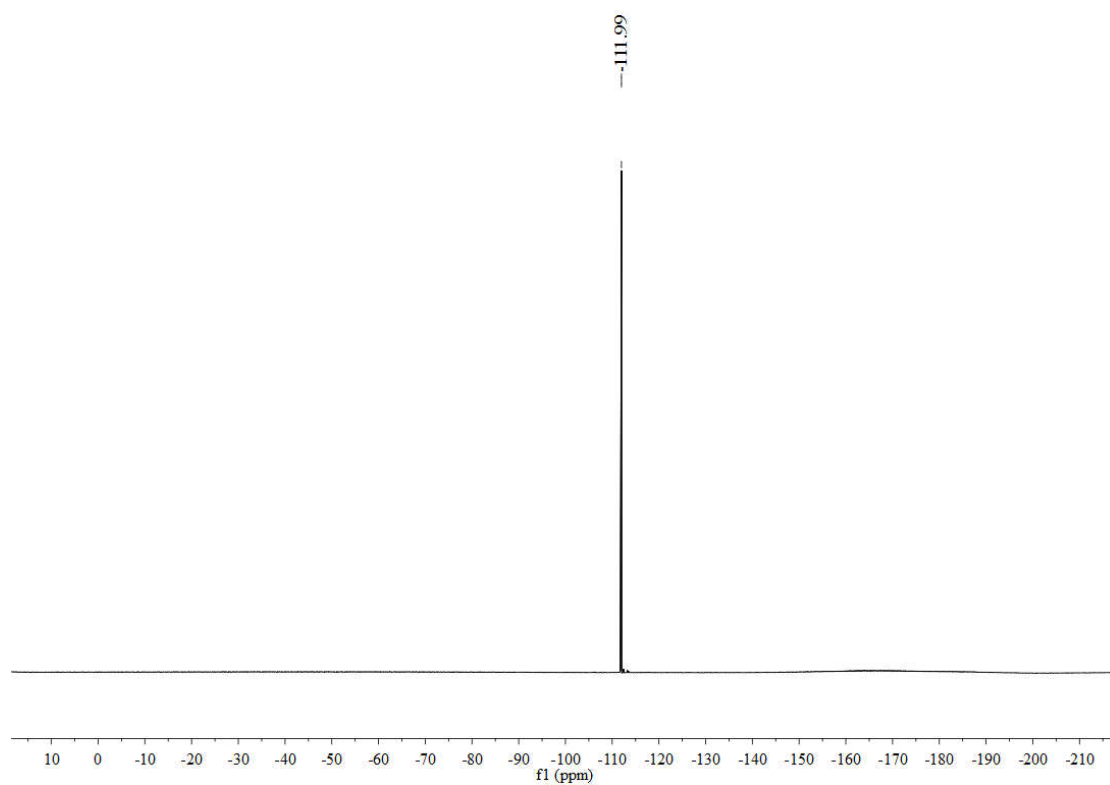

4ab <sup>1</sup>H NMR

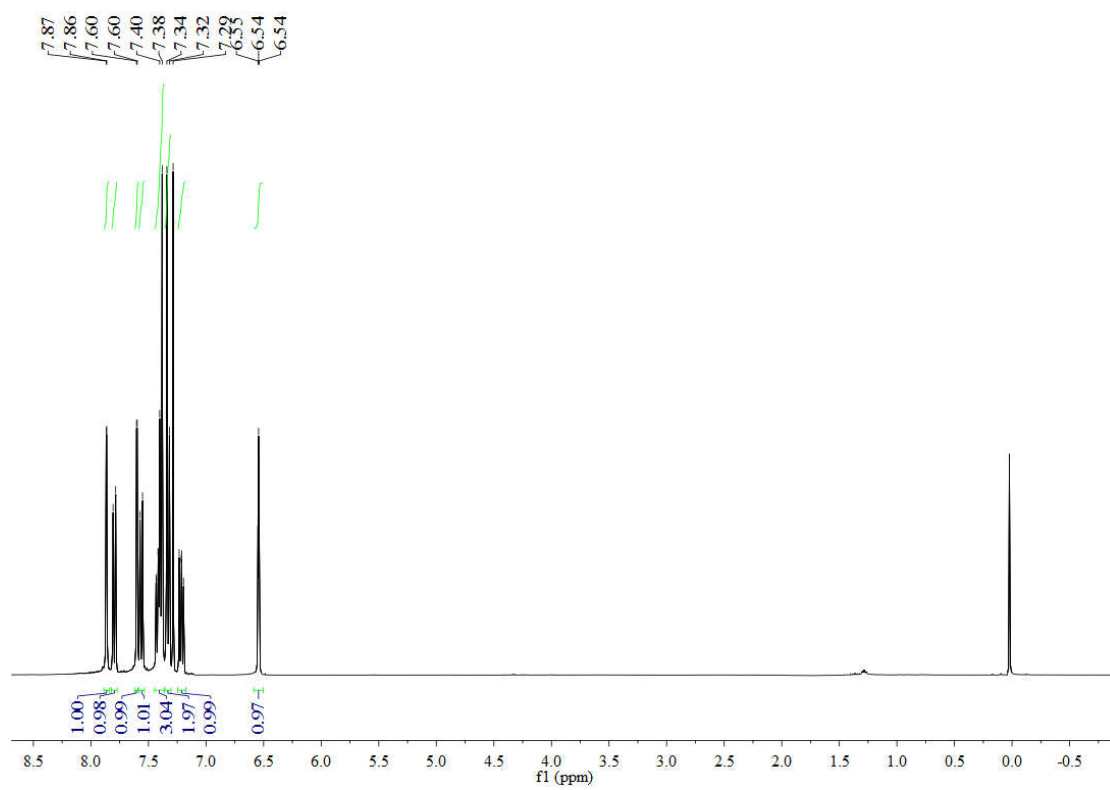

4ab <sup>13</sup>C NMR

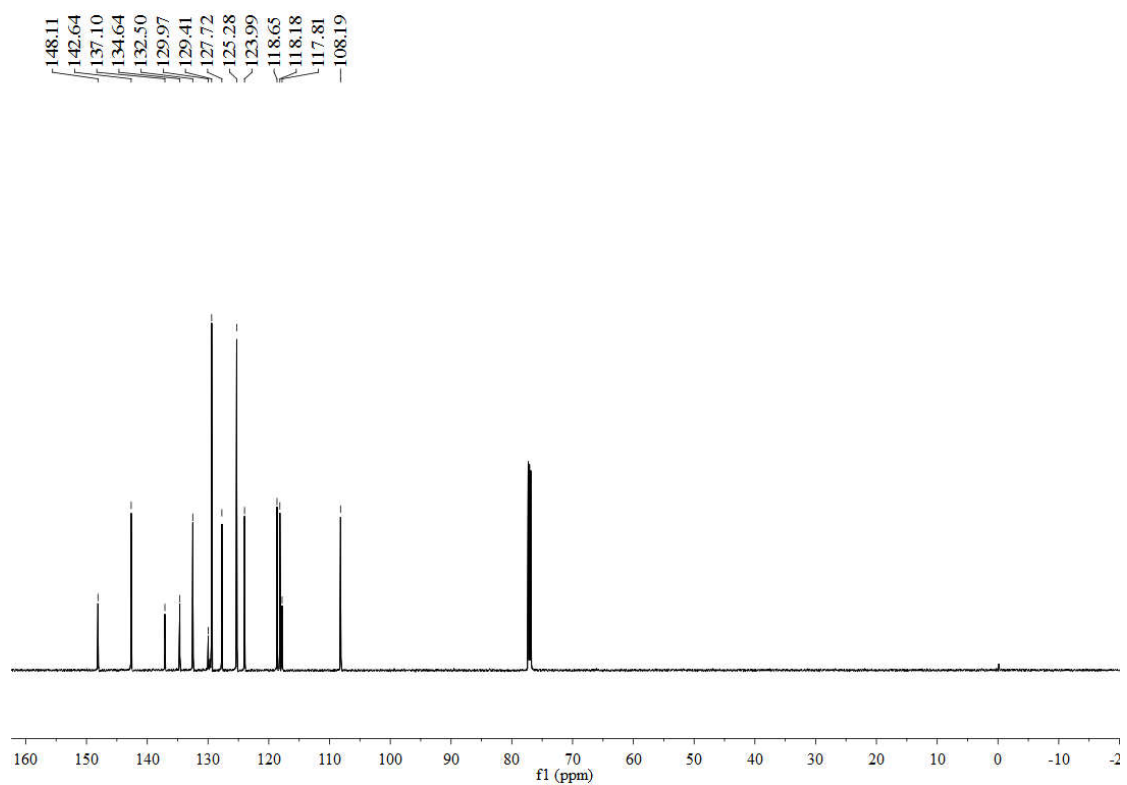

4ac <sup>1</sup>H NMR

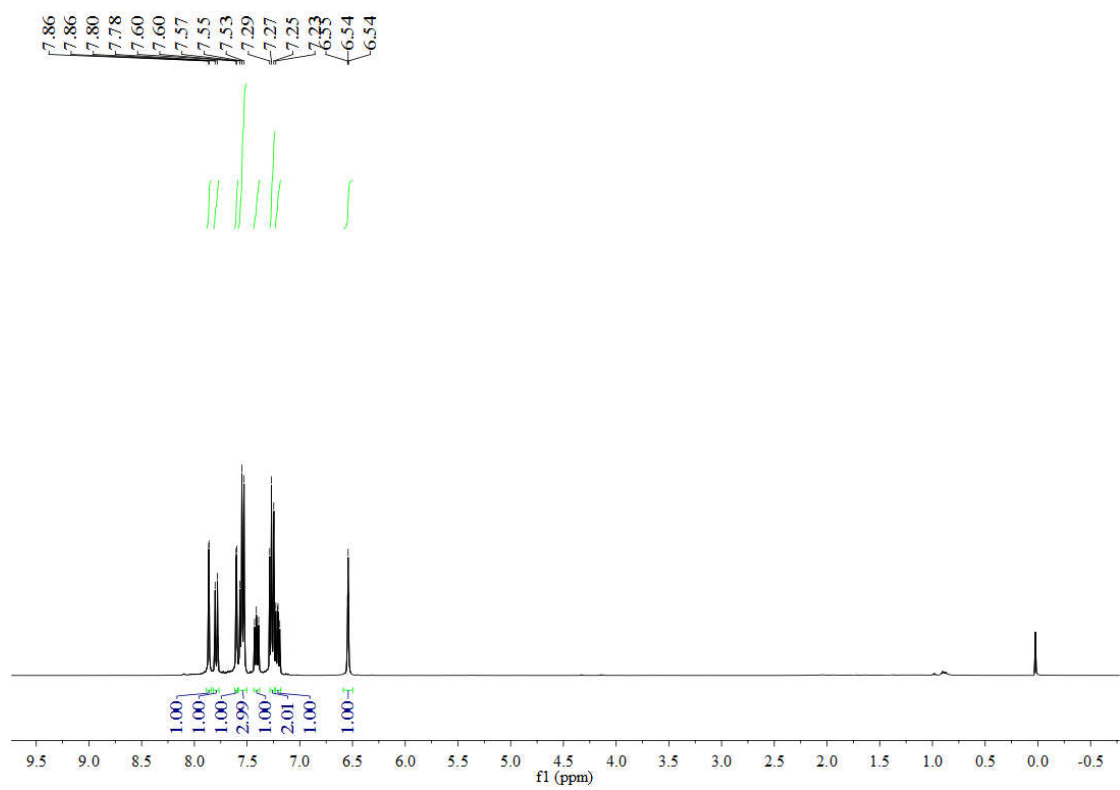

4ac <sup>13</sup>C NMR

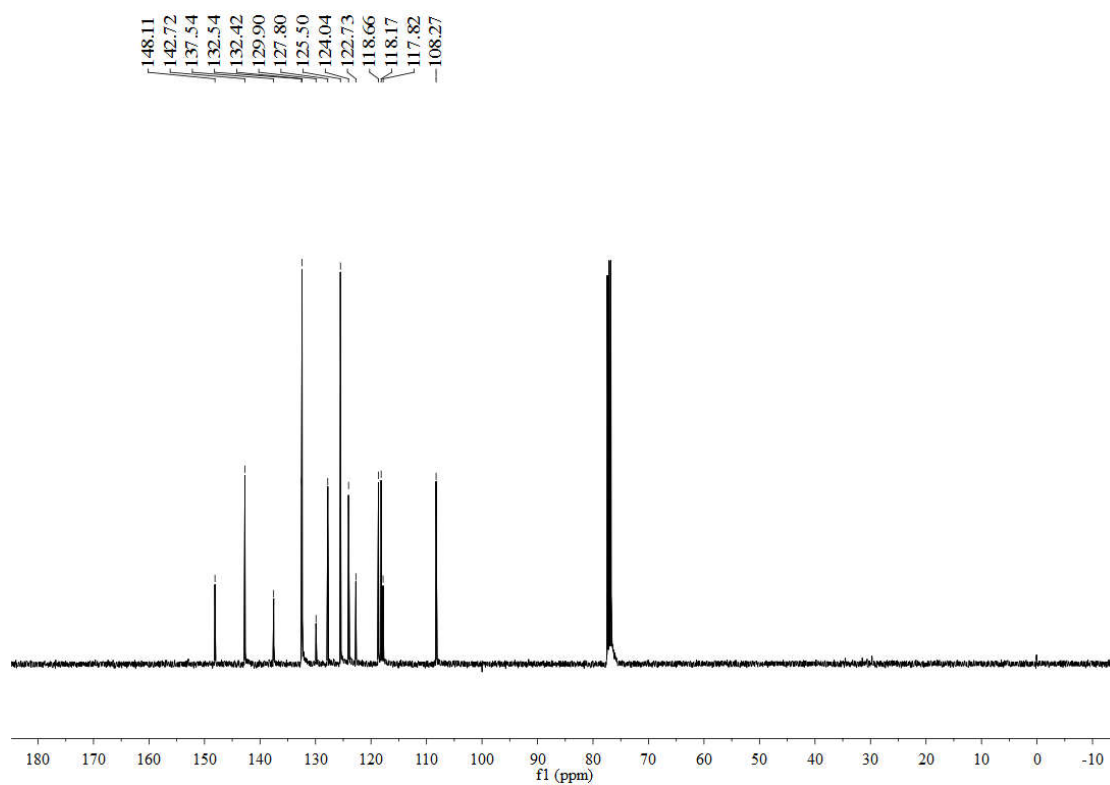

4ad <sup>1</sup>H NMR

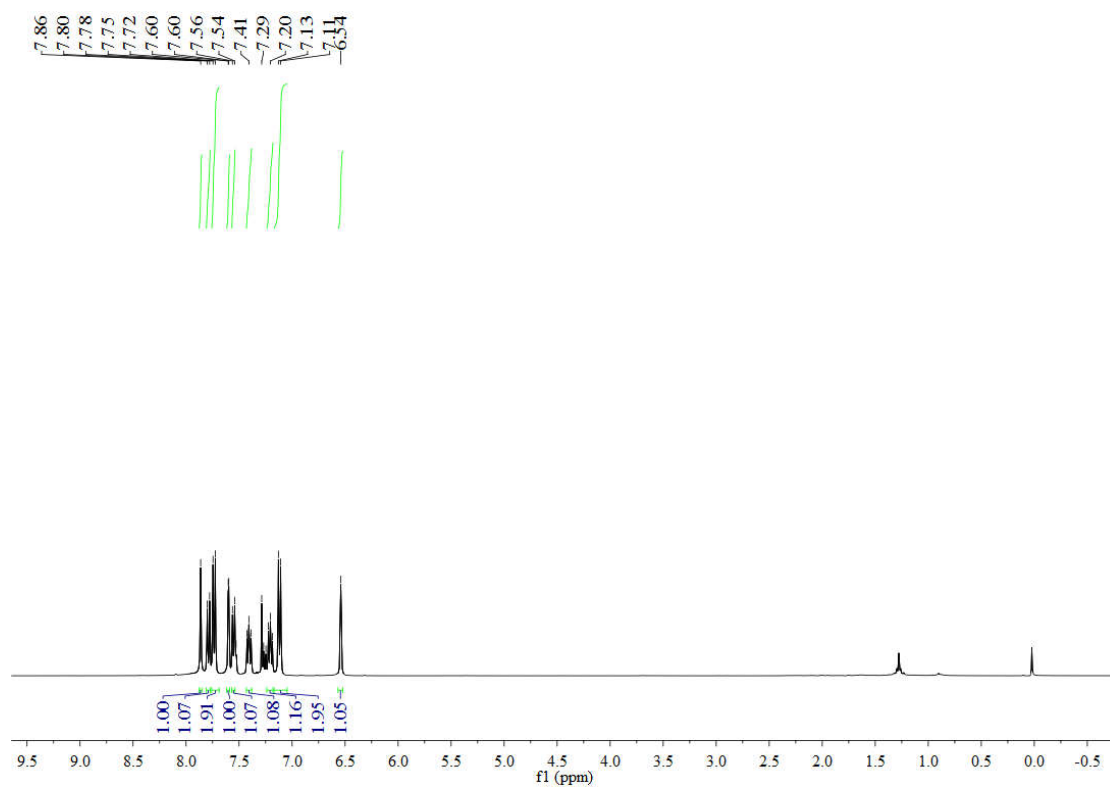

4ad <sup>13</sup>C NMR

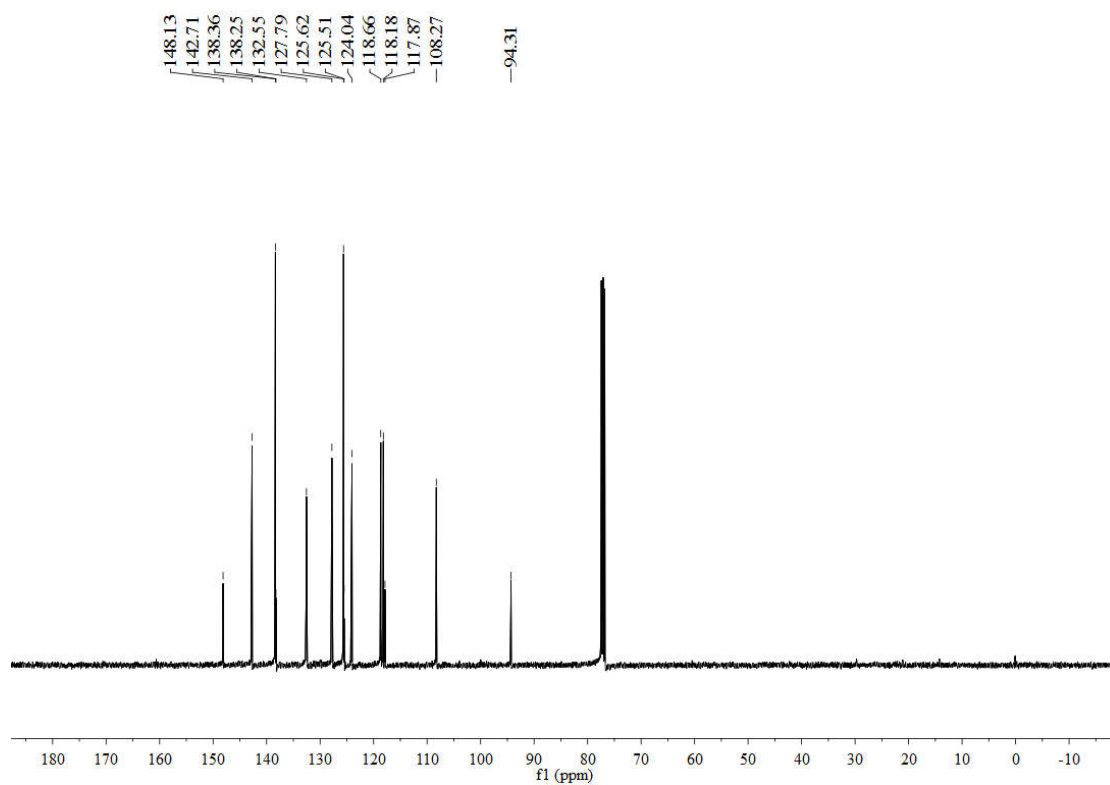

4ae <sup>1</sup>H NMR

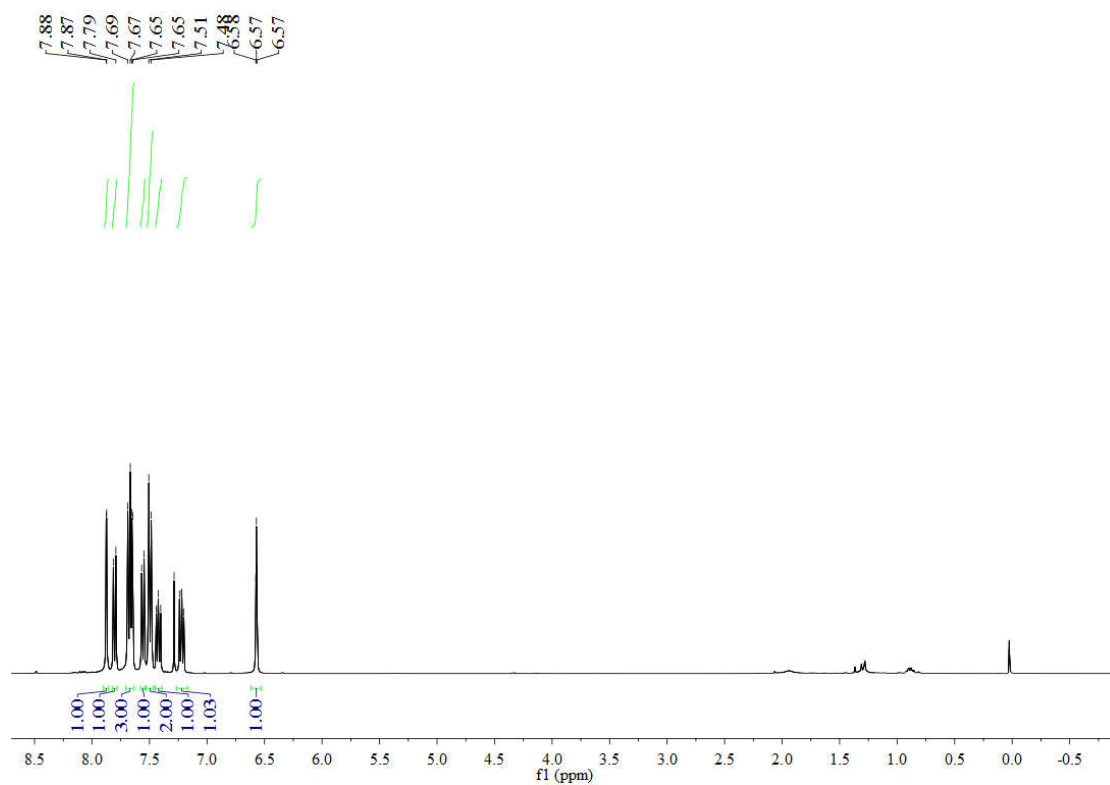



4ae <sup>13</sup>C NMR

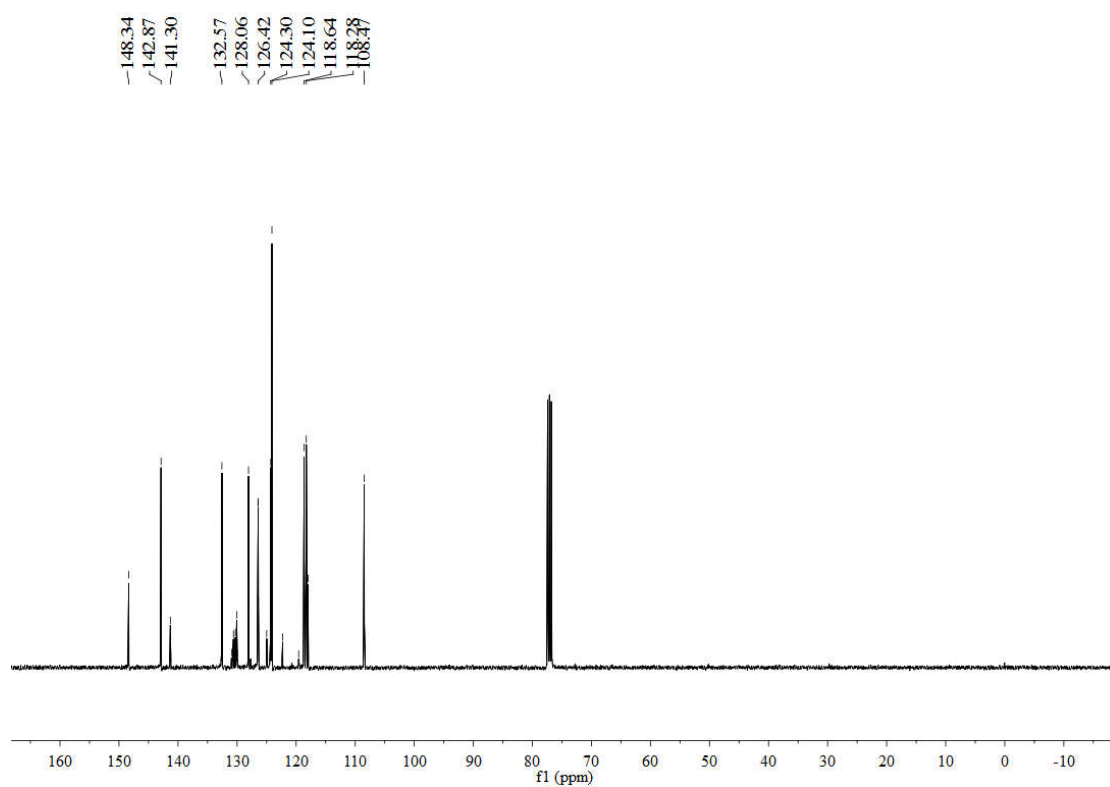

4ae <sup>19</sup>F NMR

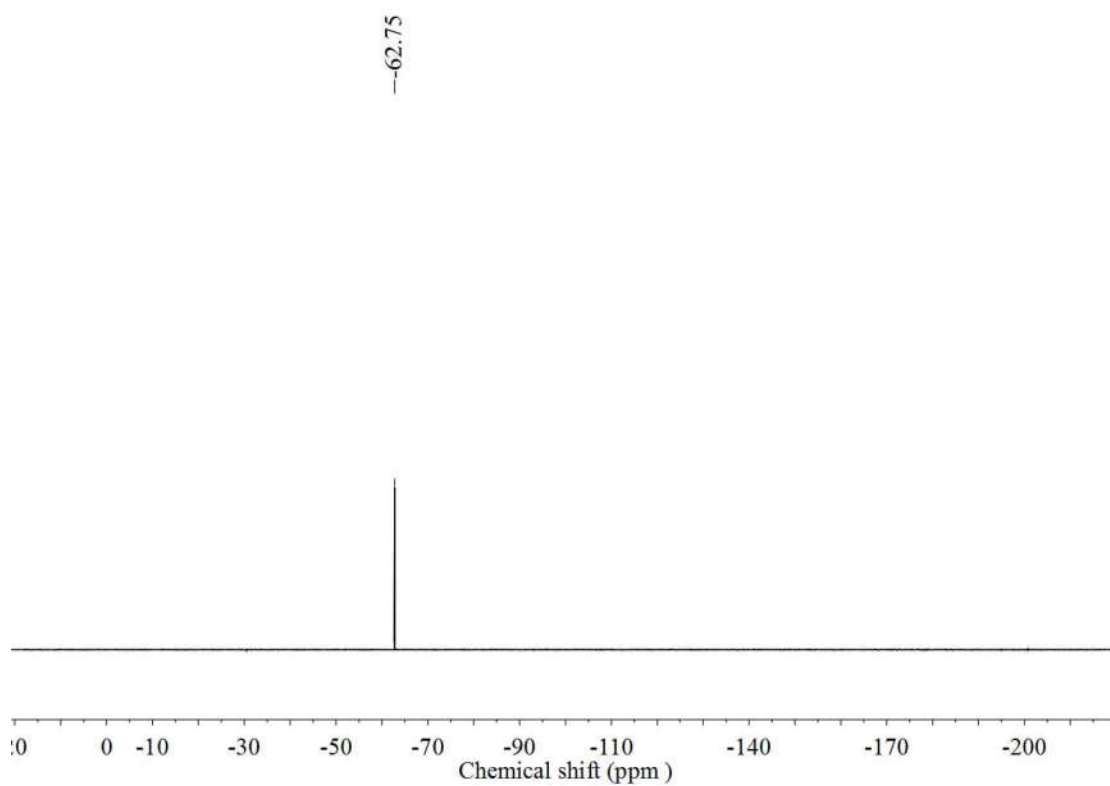

4ah <sup>1</sup>H NMR

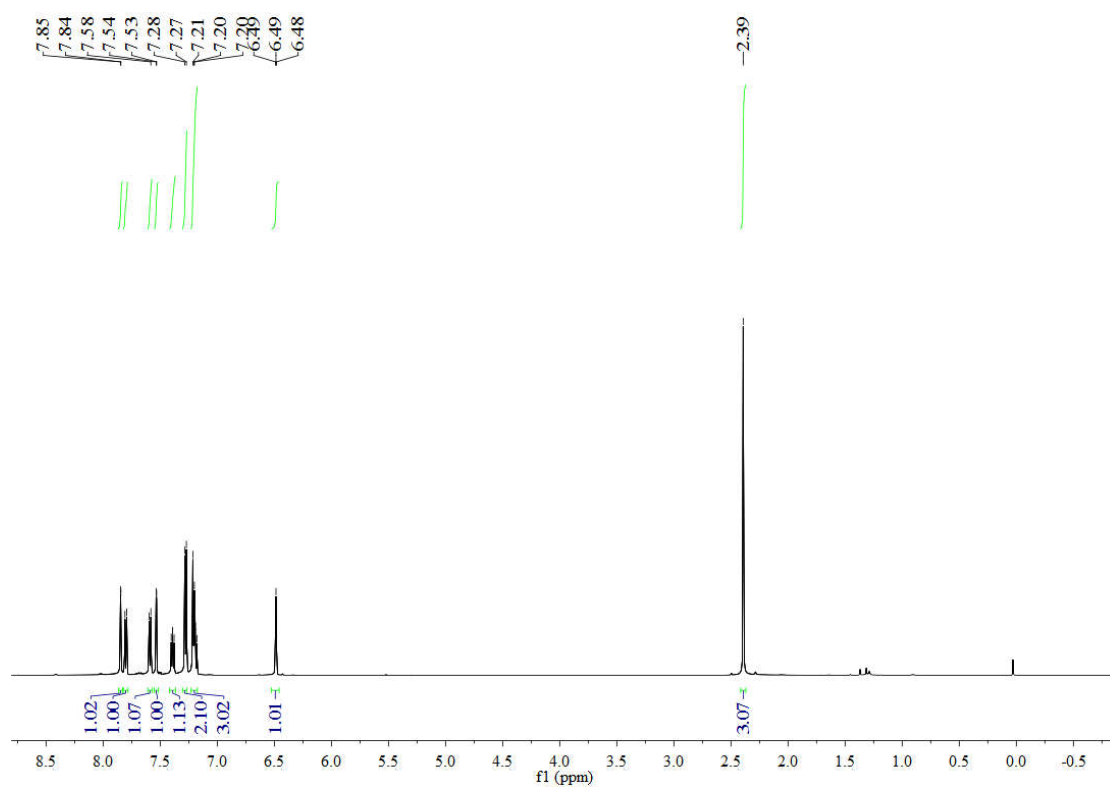

4ah <sup>13</sup>C NMR

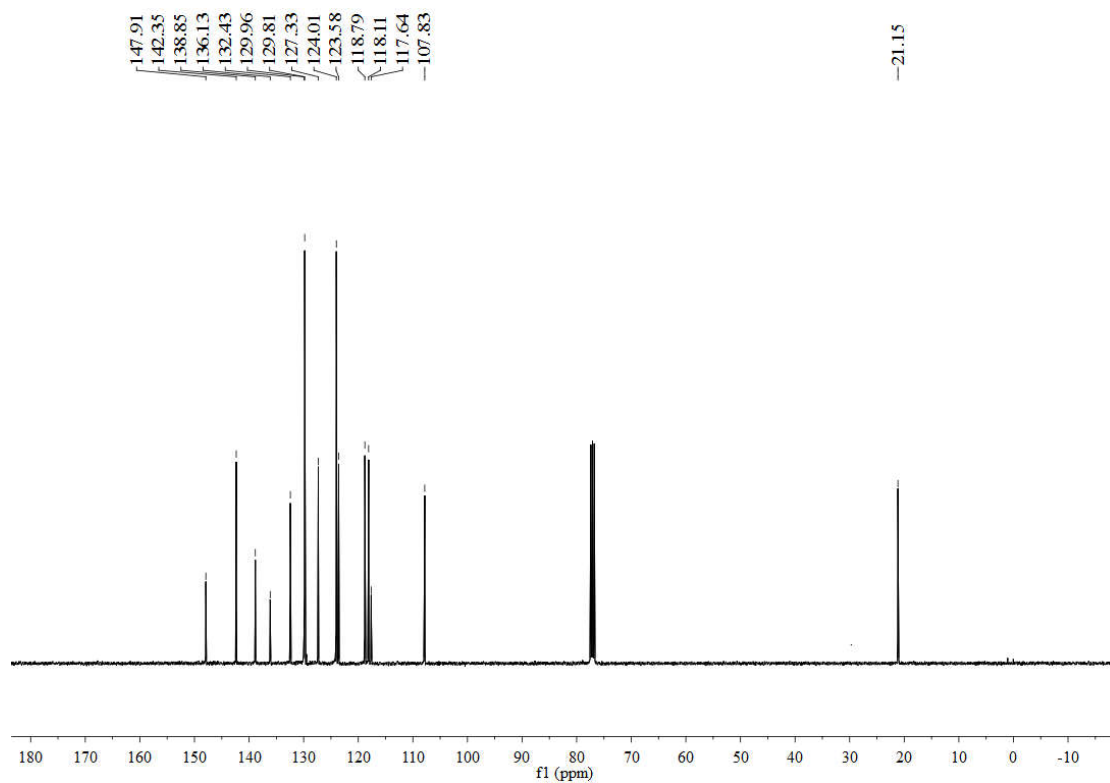

4ai <sup>1</sup>H NMR

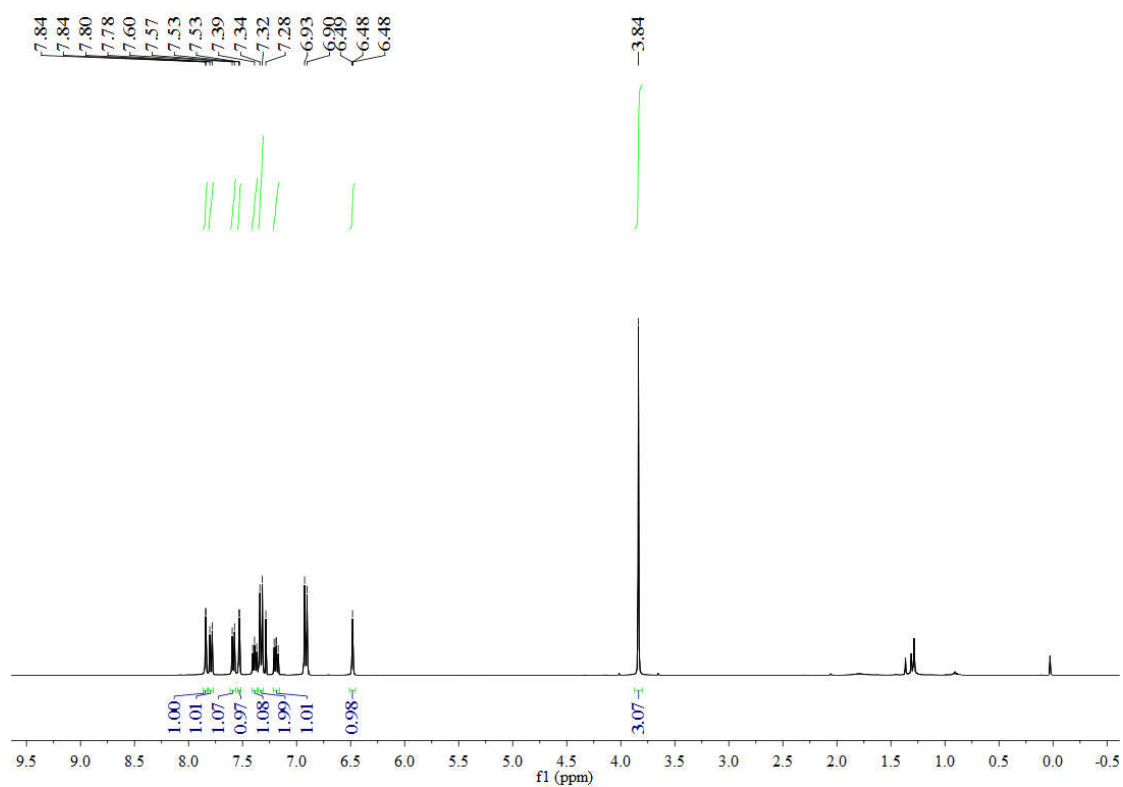

4ai <sup>13</sup>C NMR

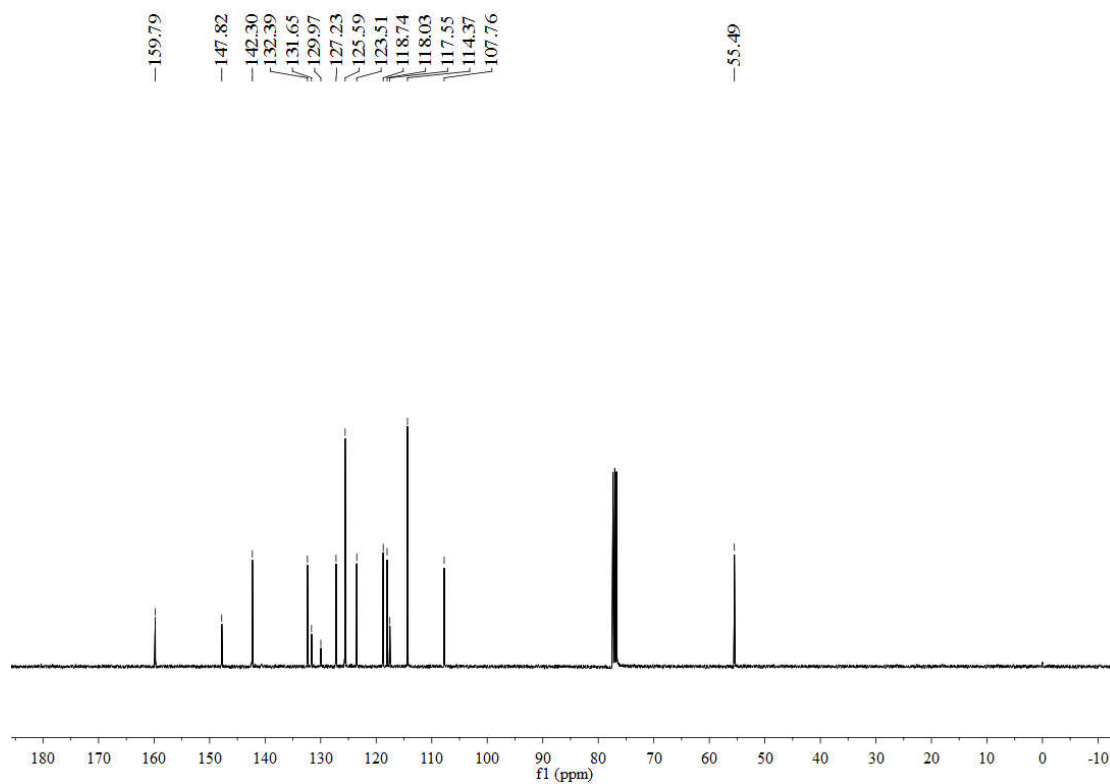

4aj <sup>1</sup>H NMR

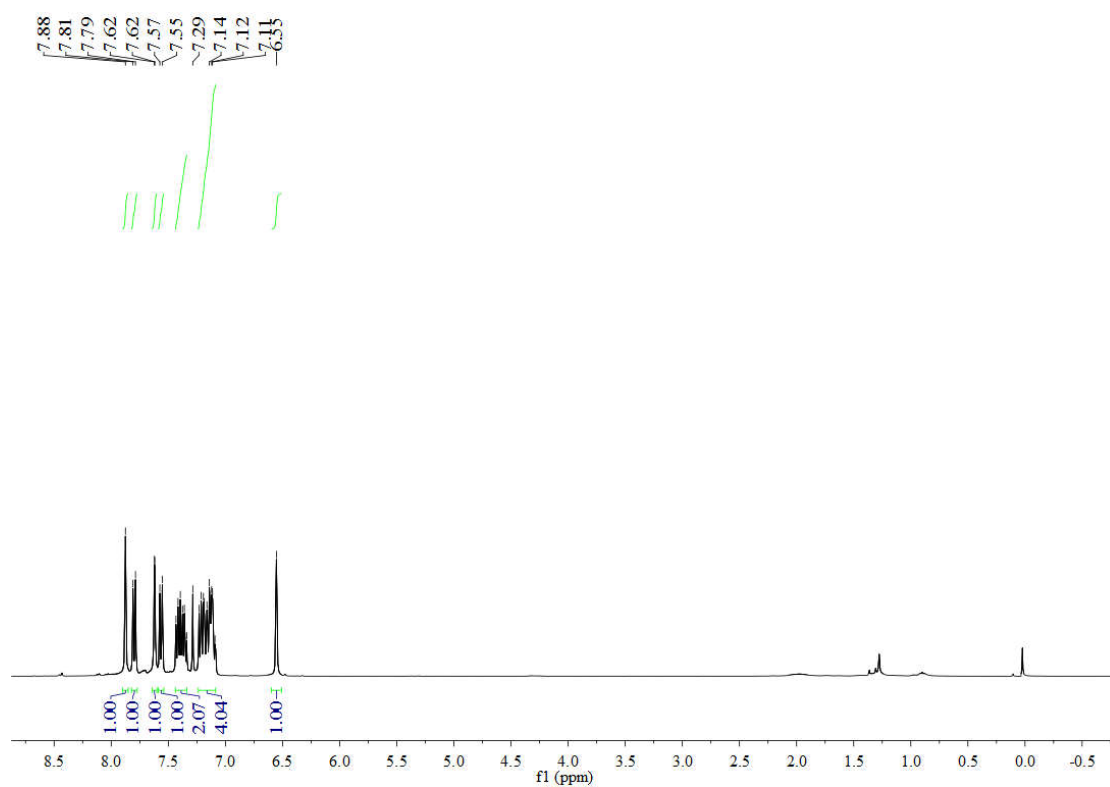

4aj <sup>13</sup>C NMR

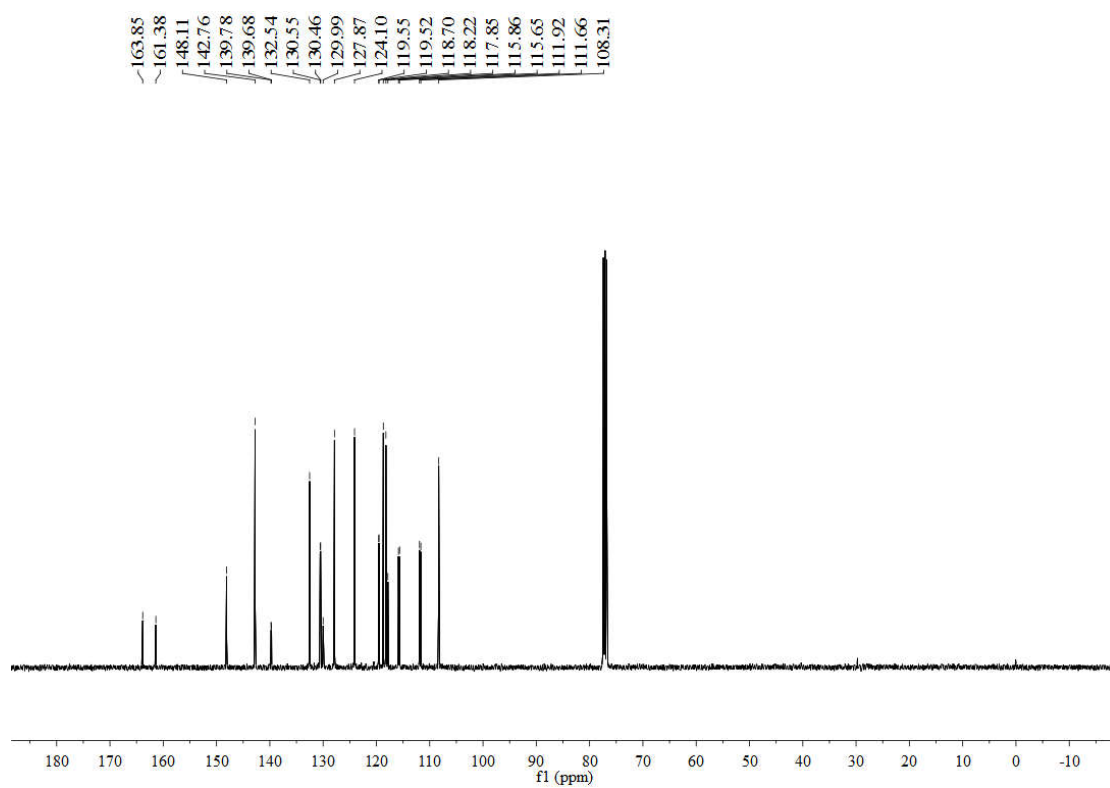

4aj  $^{19}\text{F}$  NMR

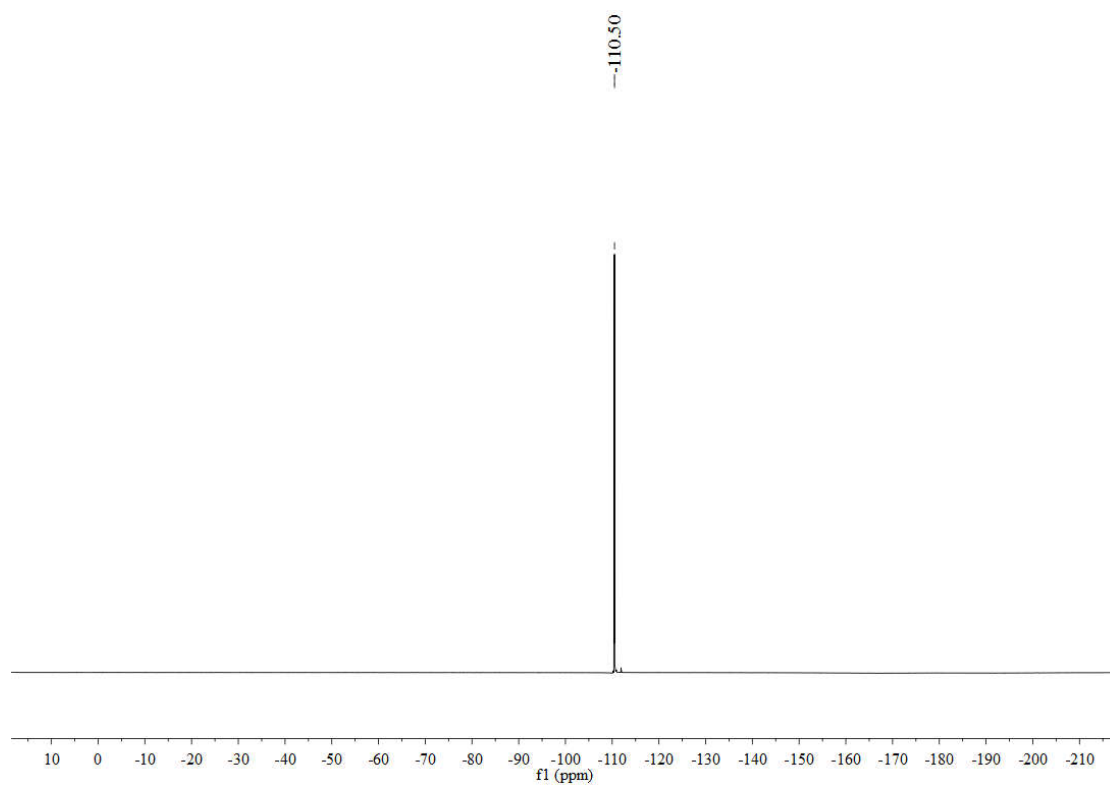

4ak  $^1\text{H}$  NMR

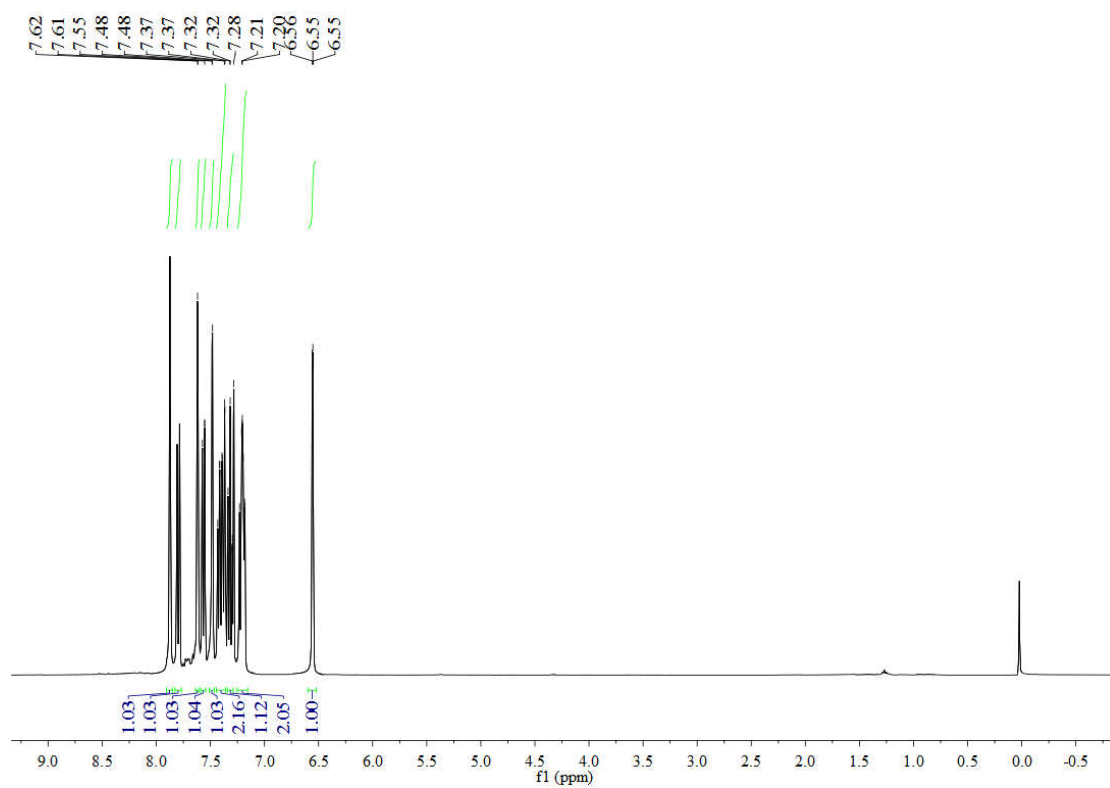

4ak <sup>13</sup>C NMR

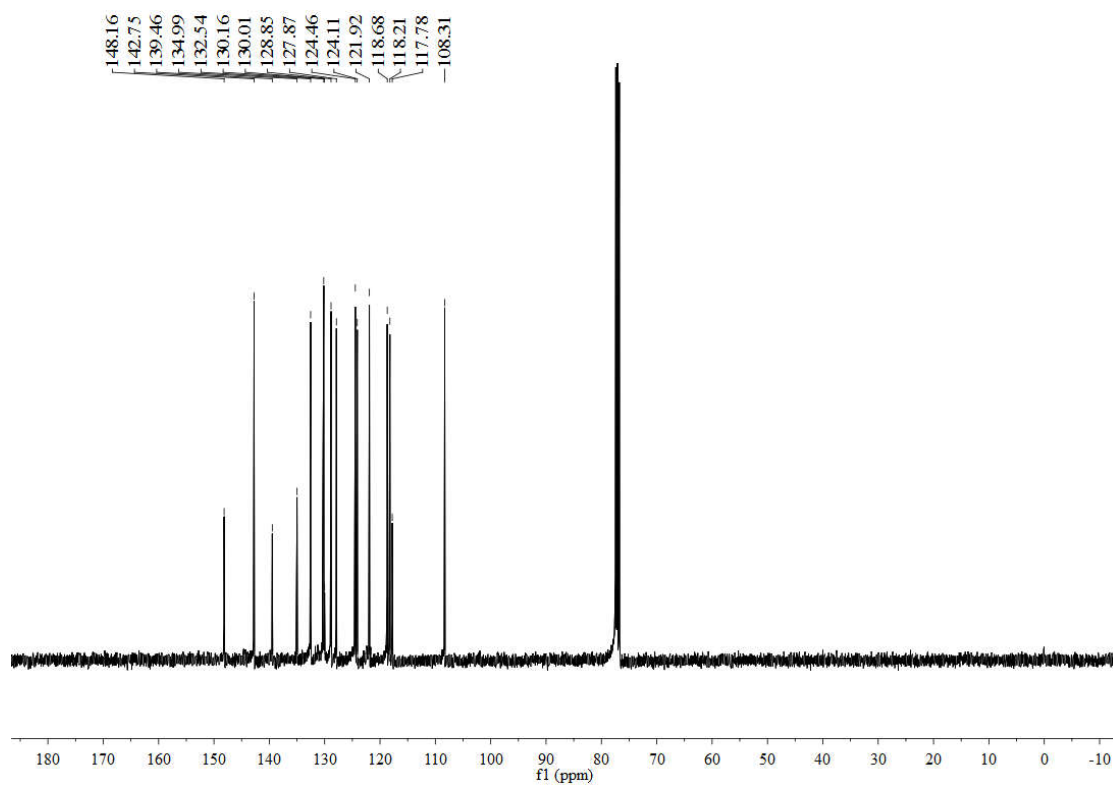

4al <sup>1</sup>H NMR

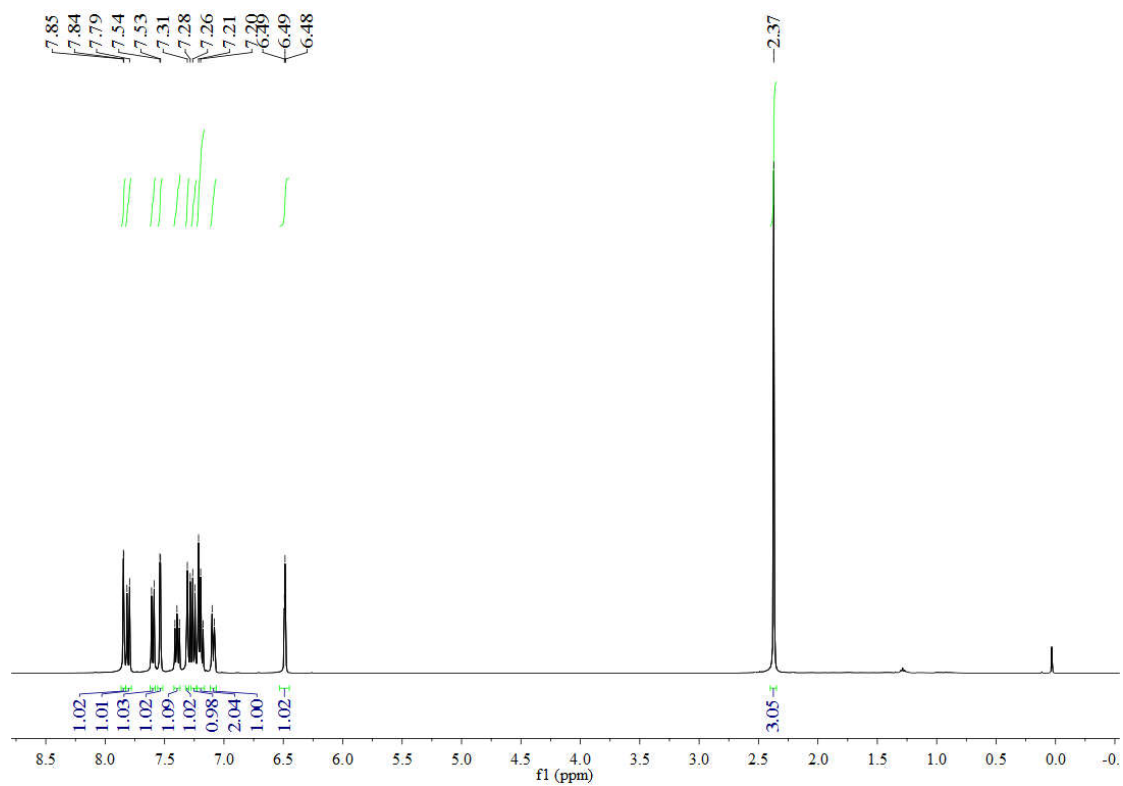

4a1 <sup>13</sup>C NMR

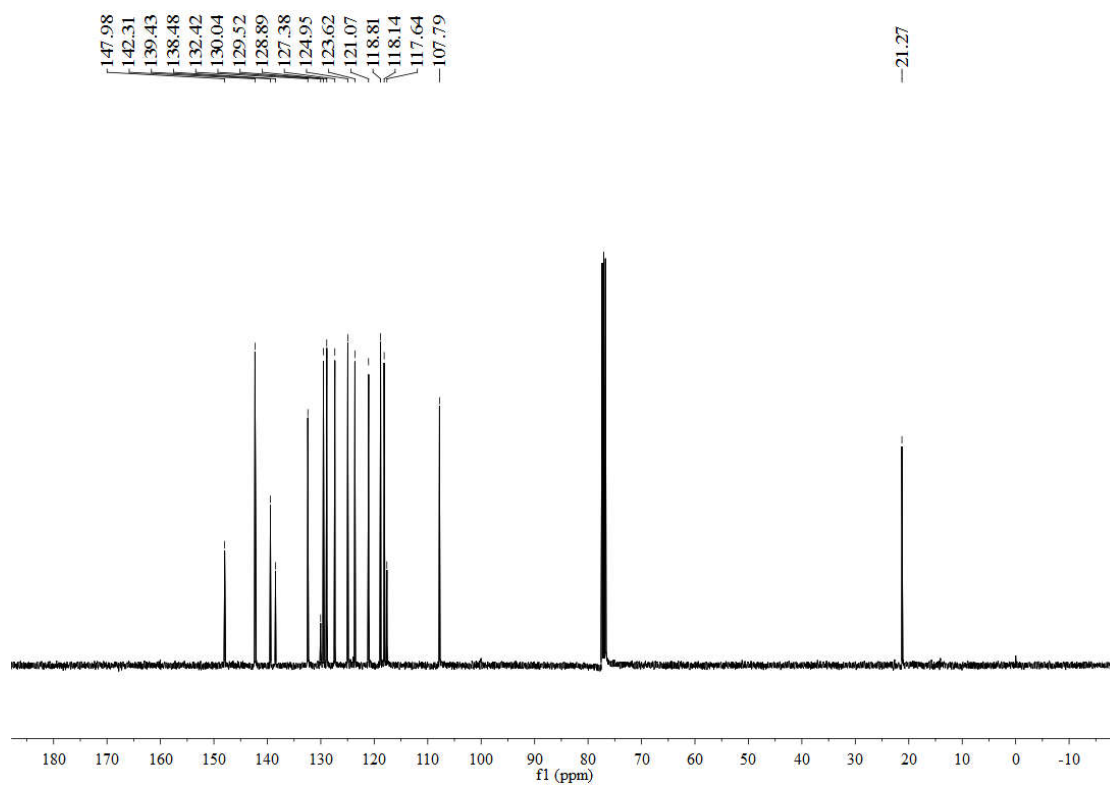

4am <sup>1</sup>H NMR

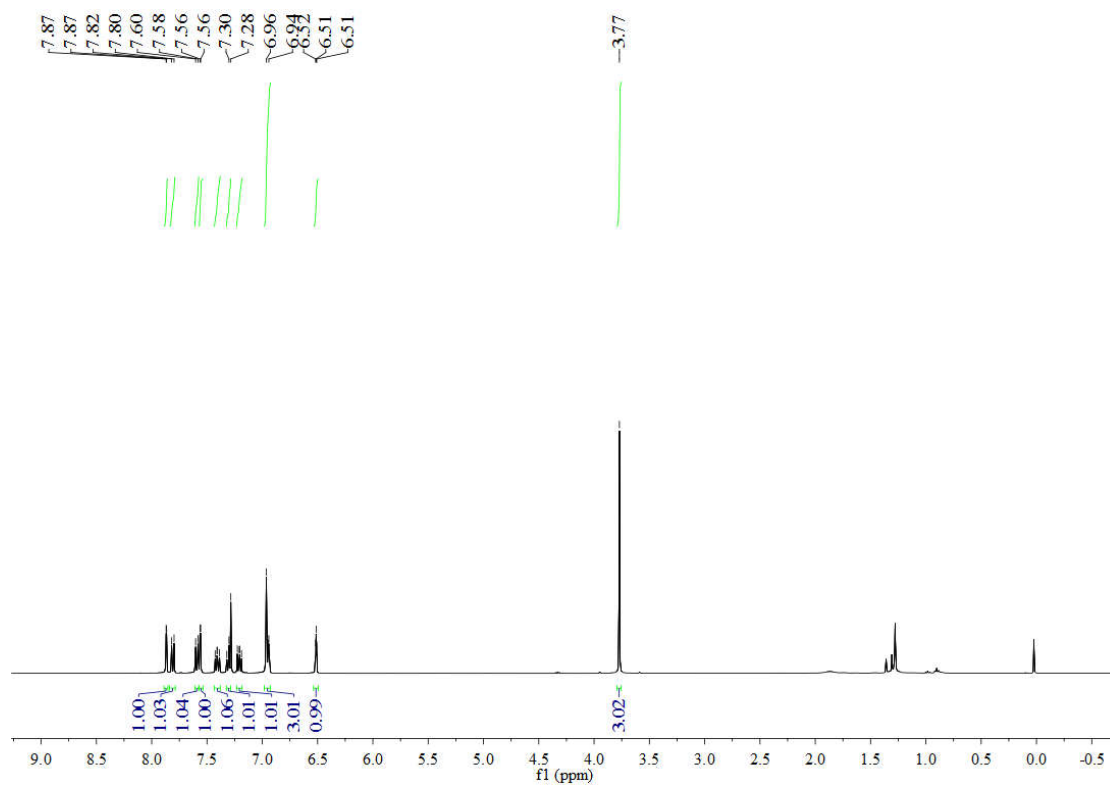

4am <sup>13</sup>C NMR

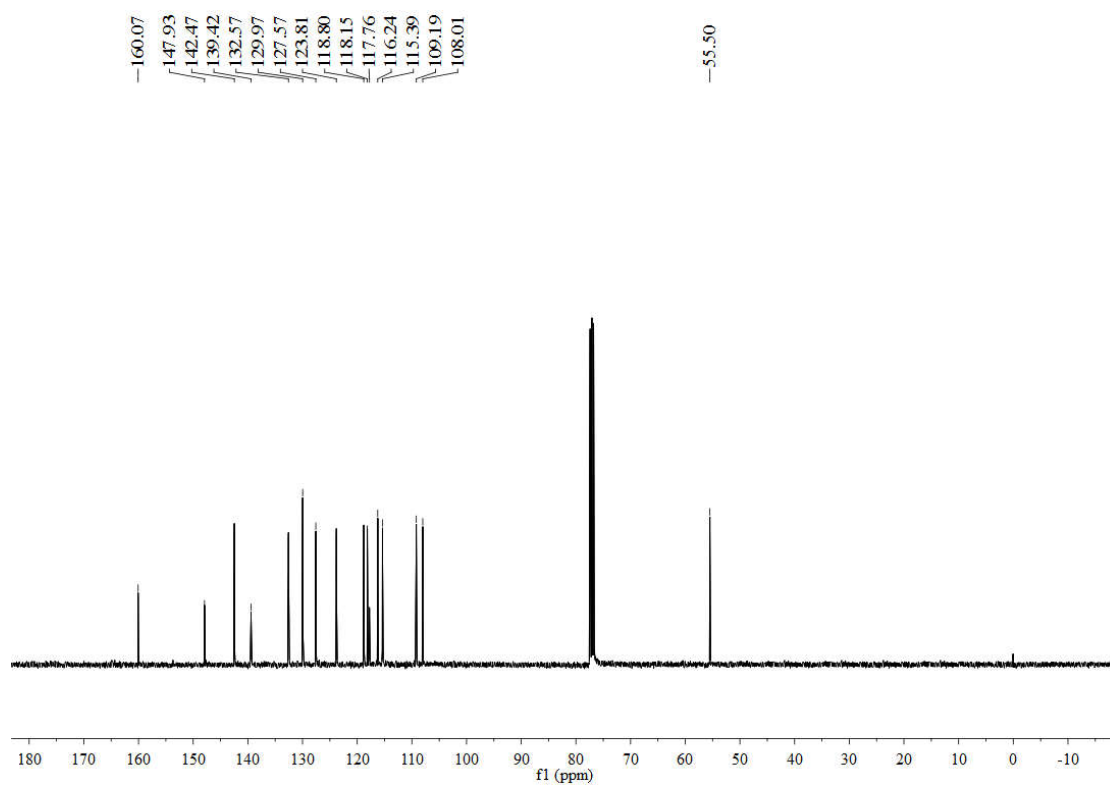

4an <sup>1</sup>H NMR

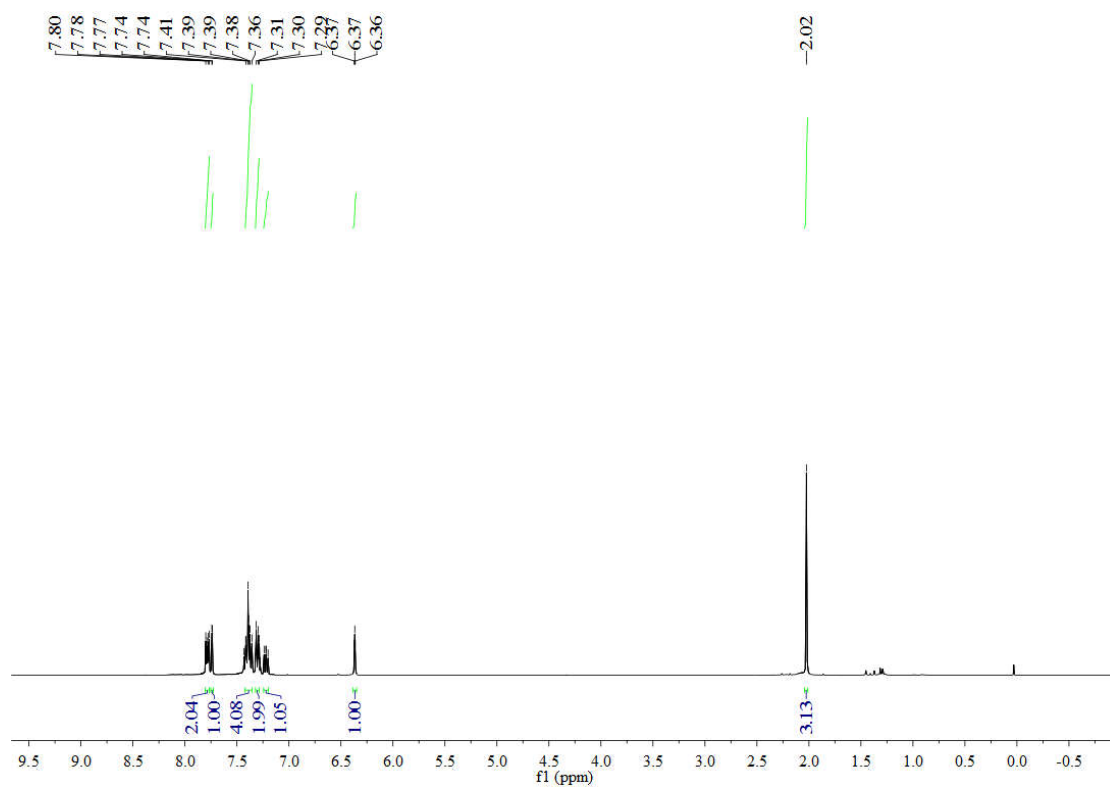



4an <sup>13</sup>C NMR

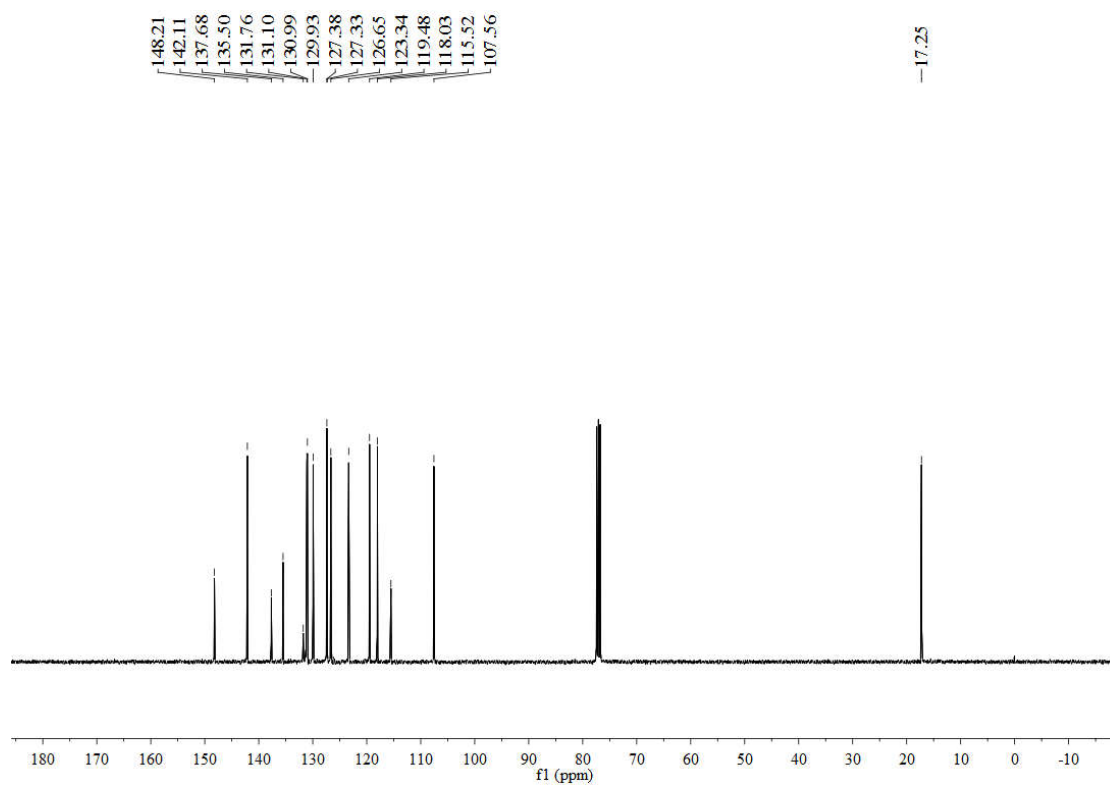

4ao <sup>1</sup>H NMR

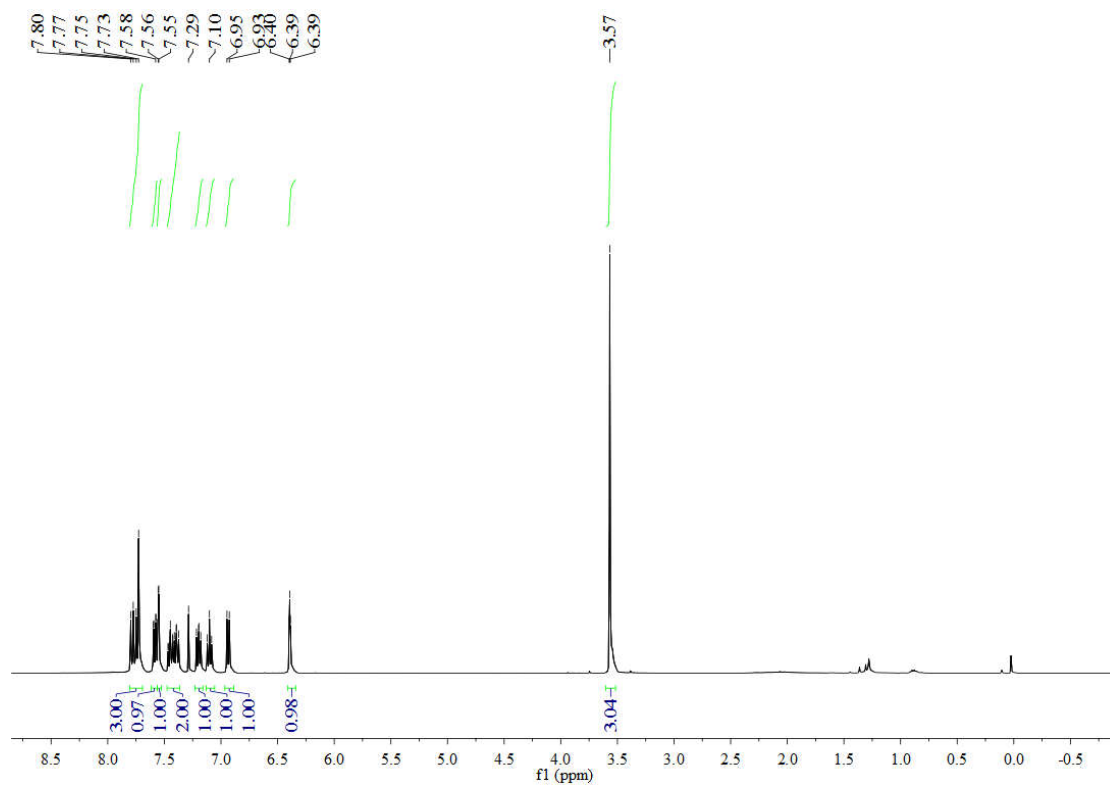

4ao <sup>13</sup>C NMR

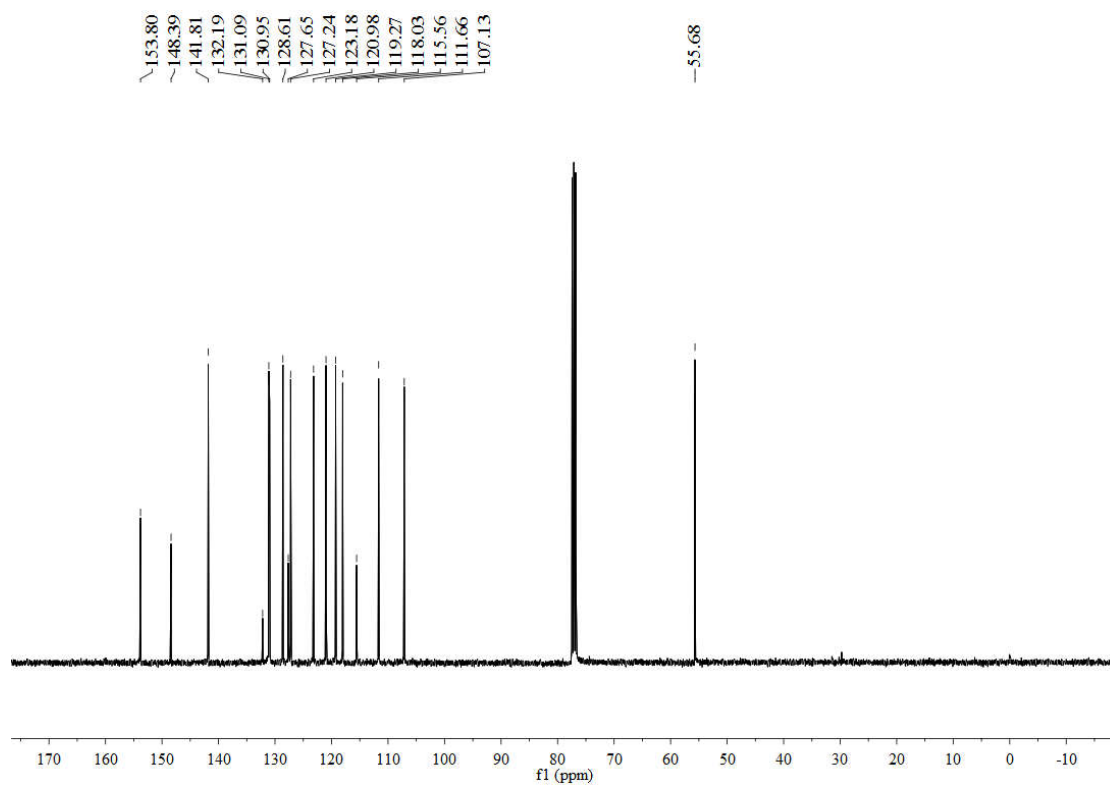

4ap <sup>1</sup>H NMR

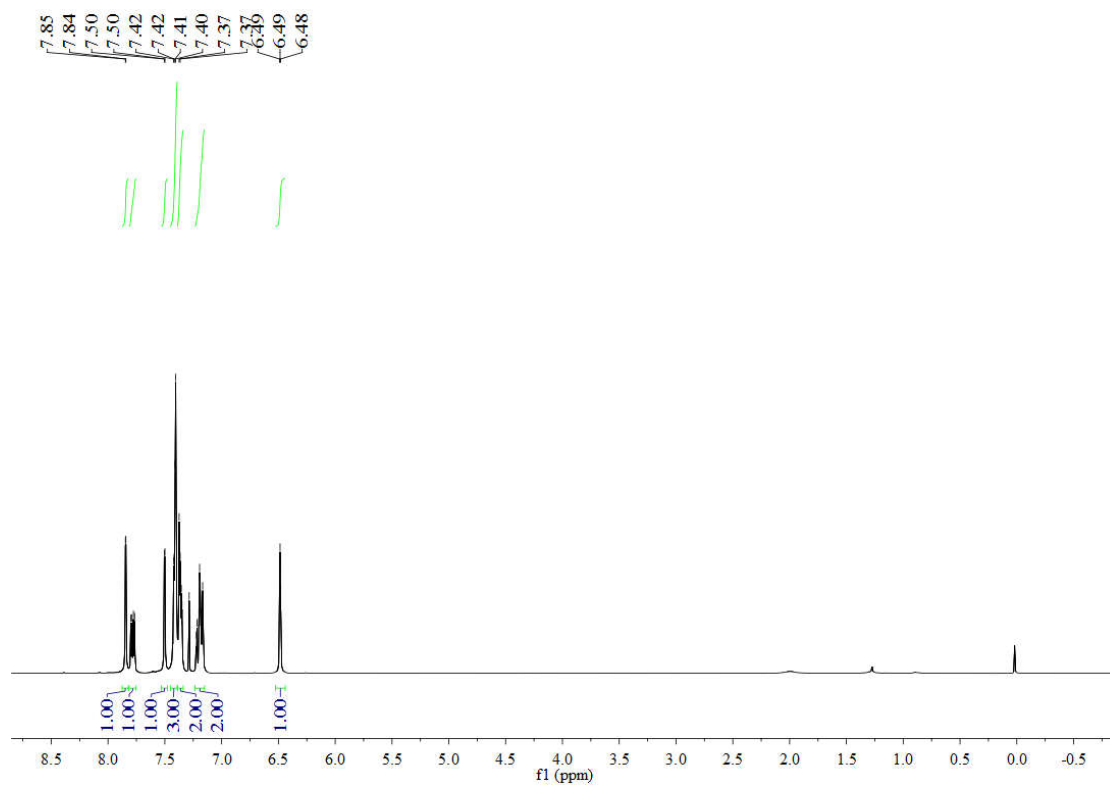

4ap  $^{13}\text{C}$  NMR

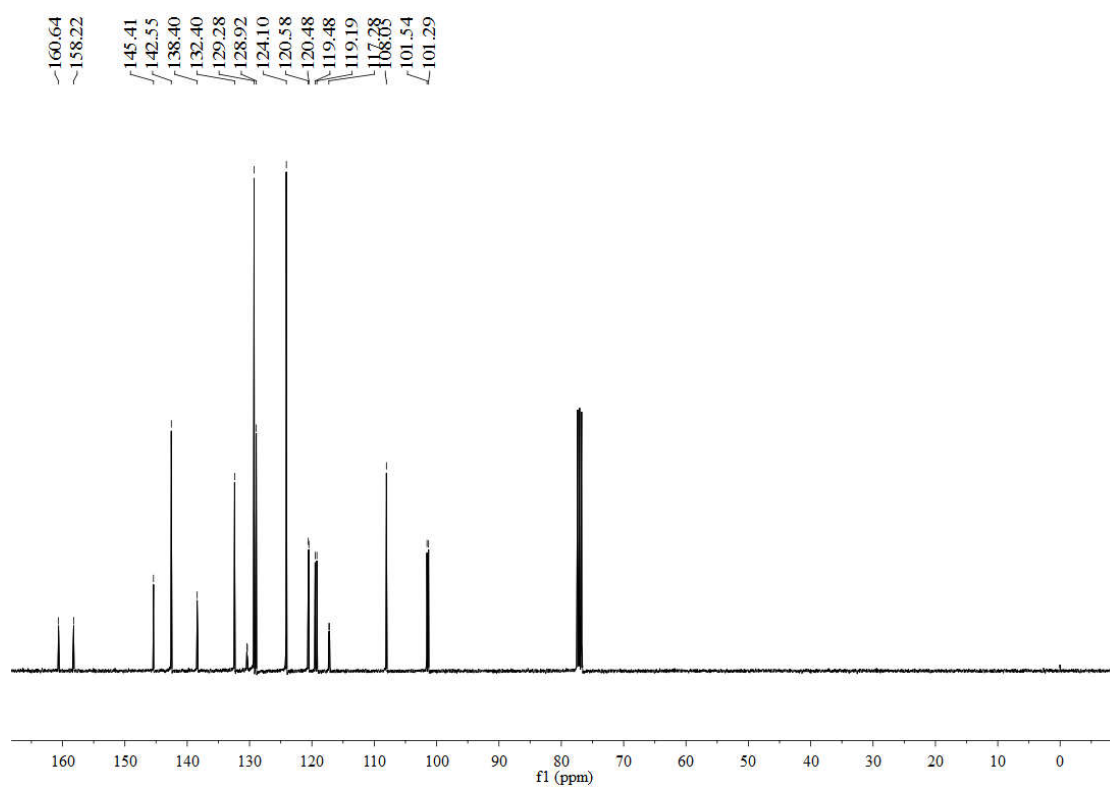

4ap  $^{19}\text{F}$  NMR

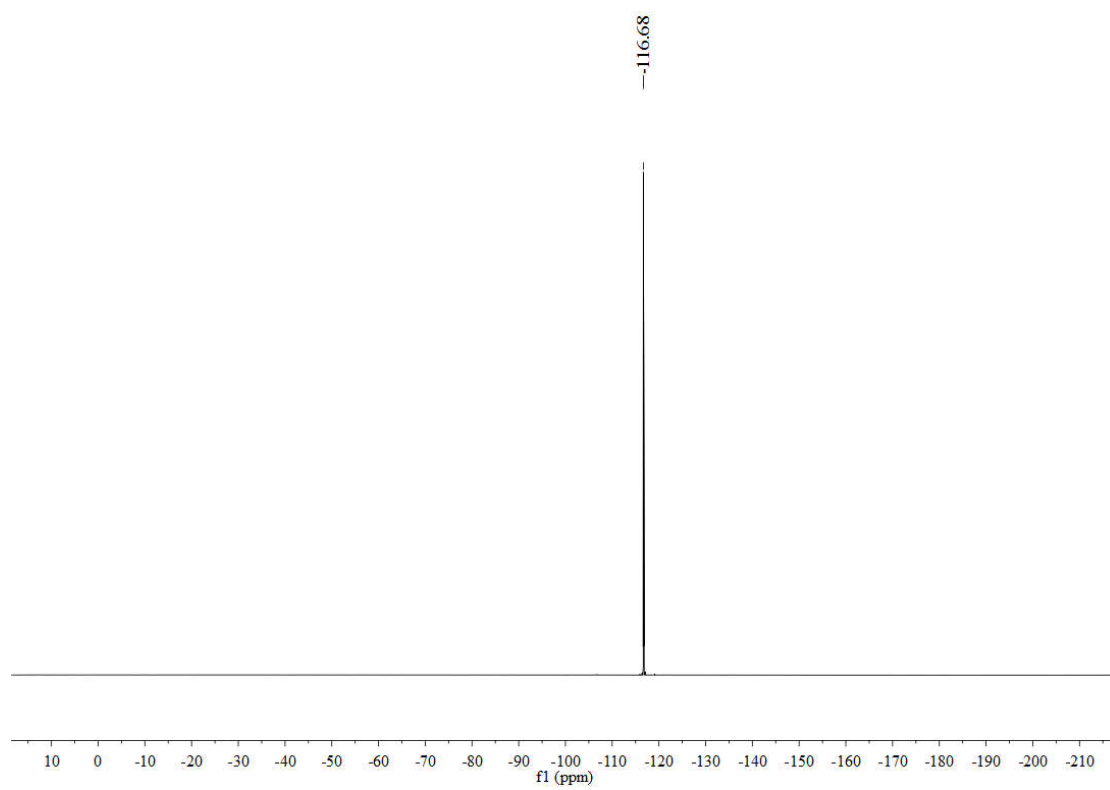

4aq <sup>1</sup>H NMR

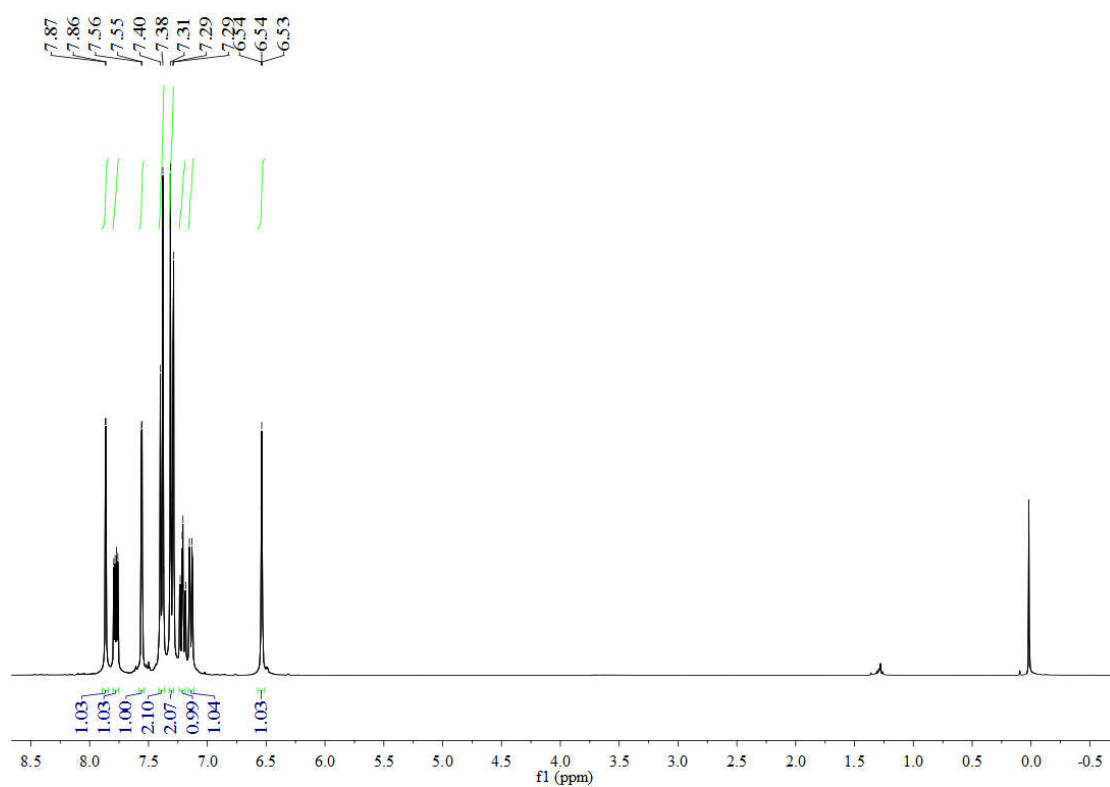

4aq <sup>13</sup>C NMR

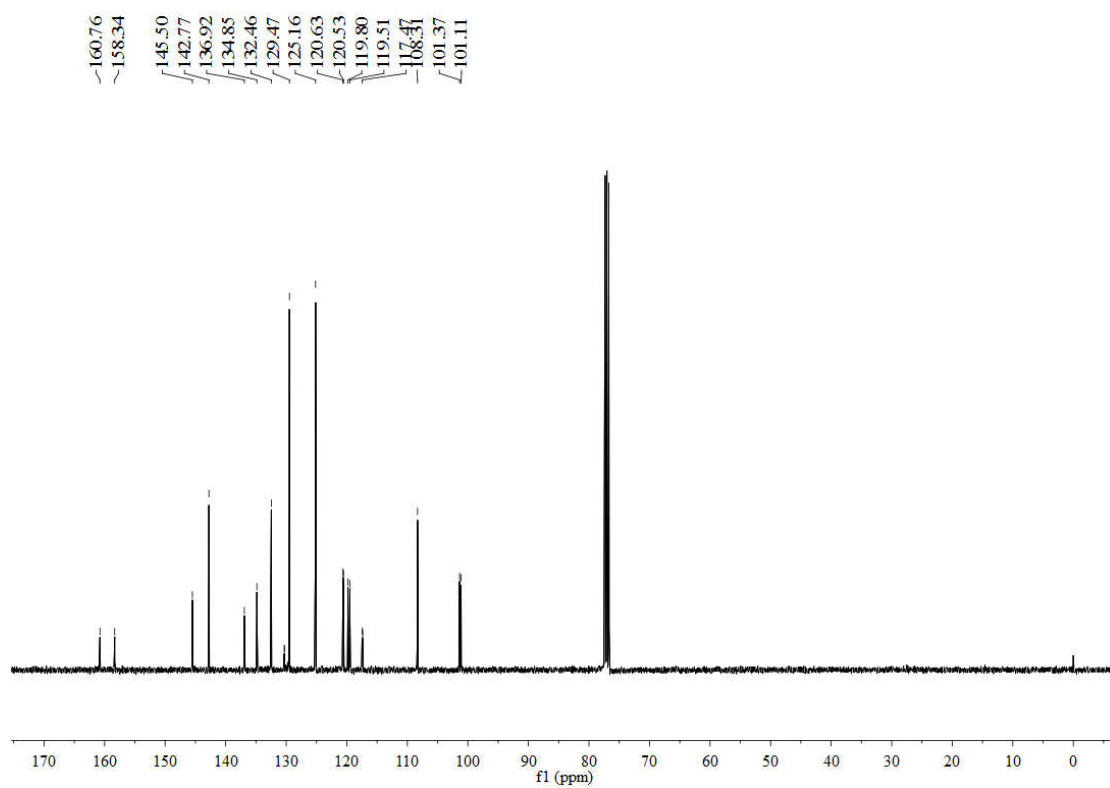

4aq  $^{19}\text{F}$  NMR

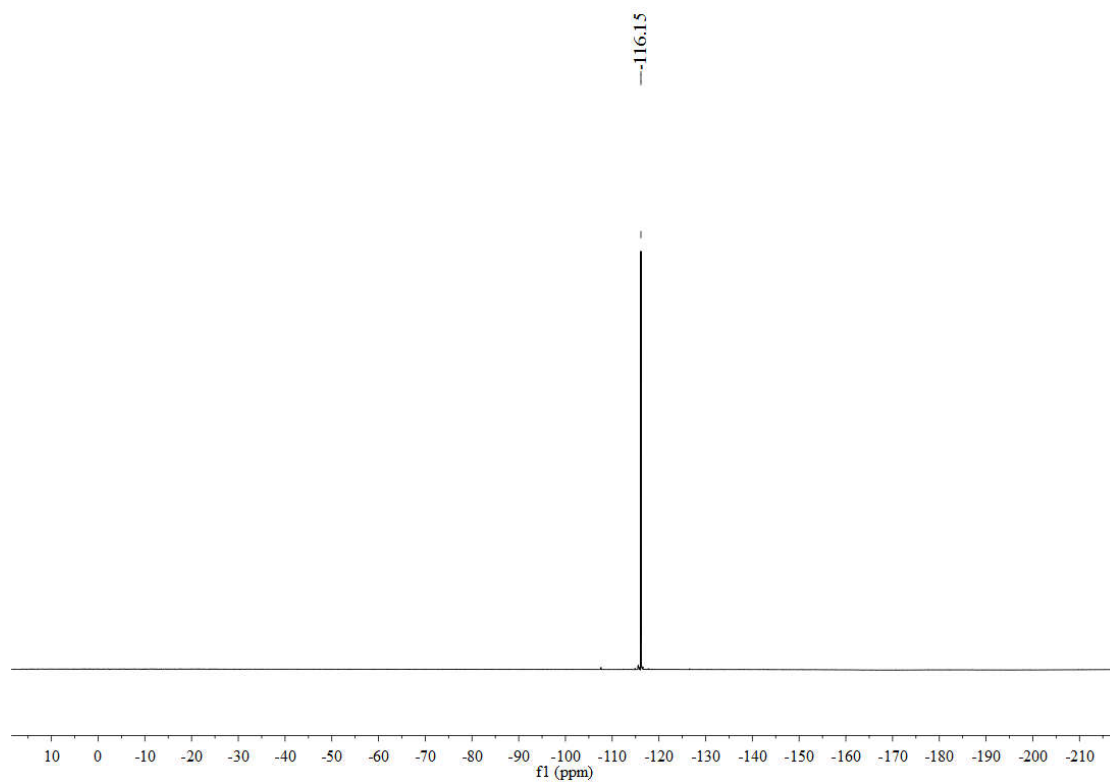

4ar  $^1\text{H}$  NMR

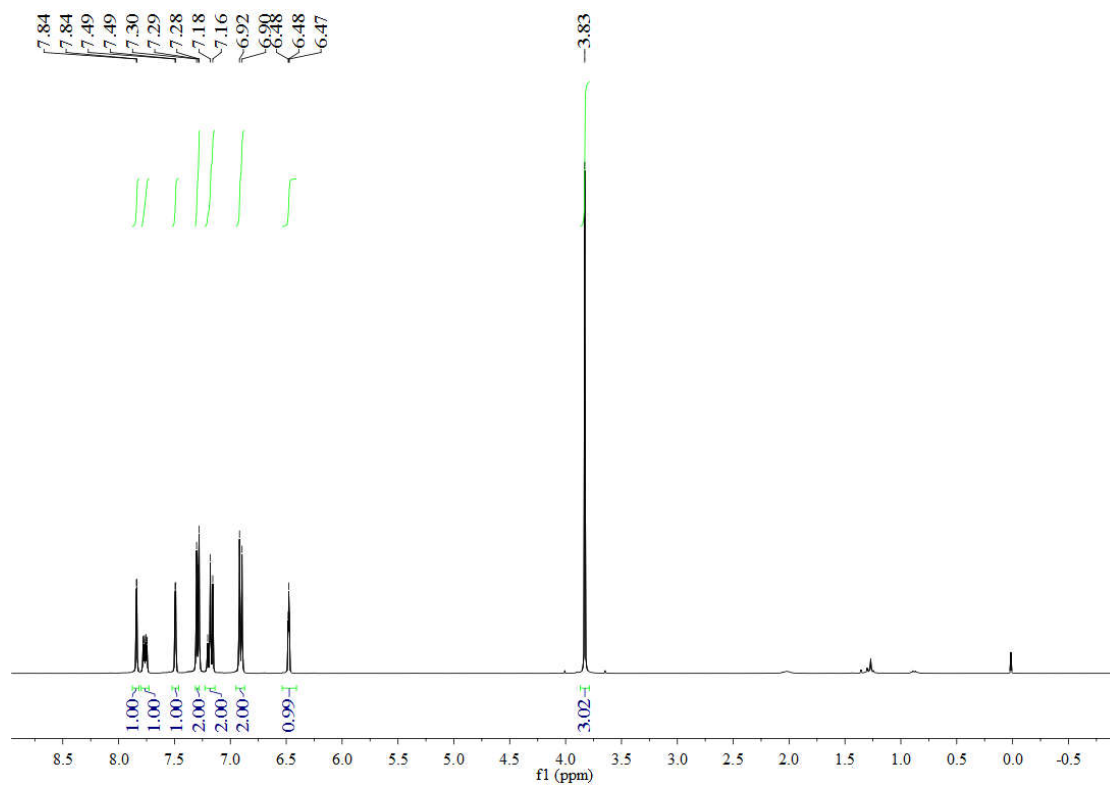

4ar <sup>13</sup>C NMR

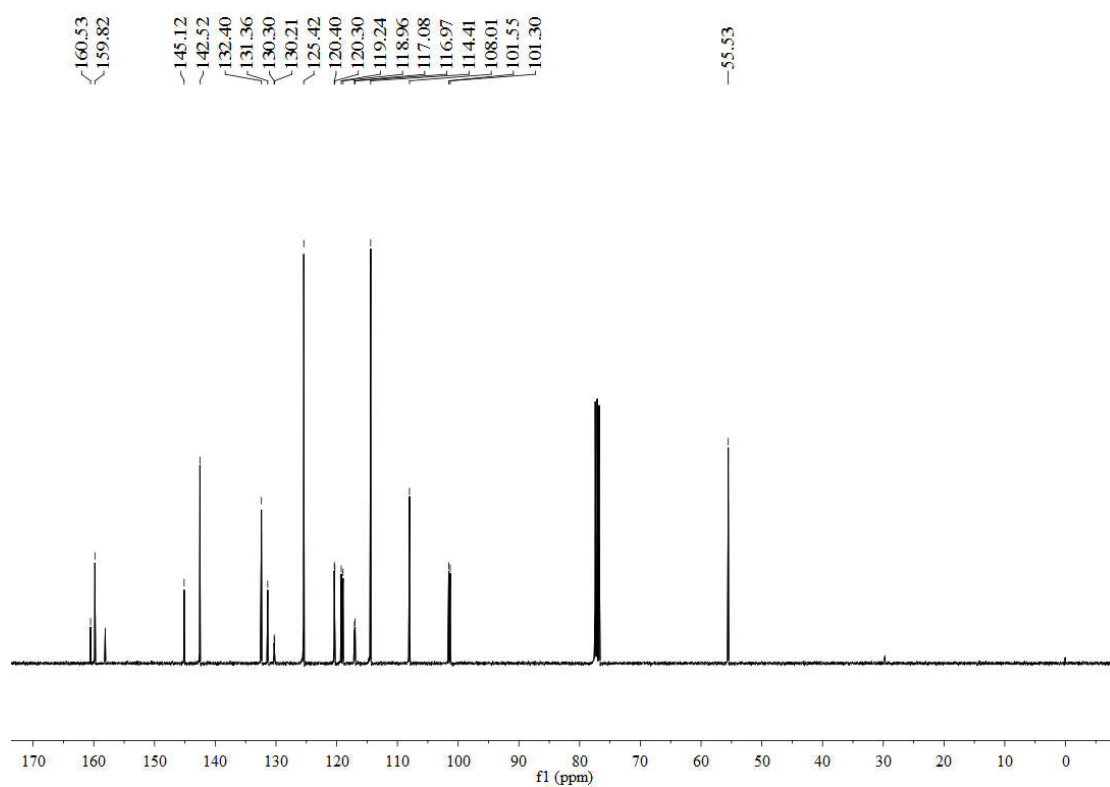

4ar <sup>19</sup>F NMR

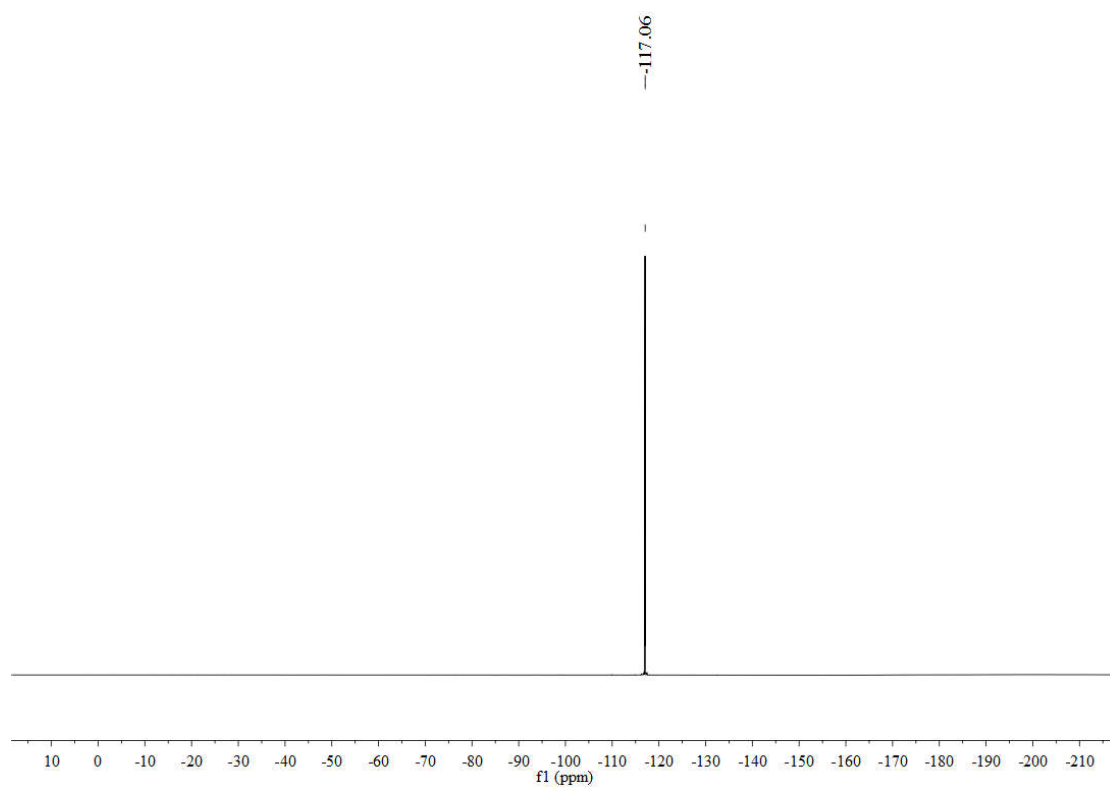

4as <sup>1</sup>H NMR

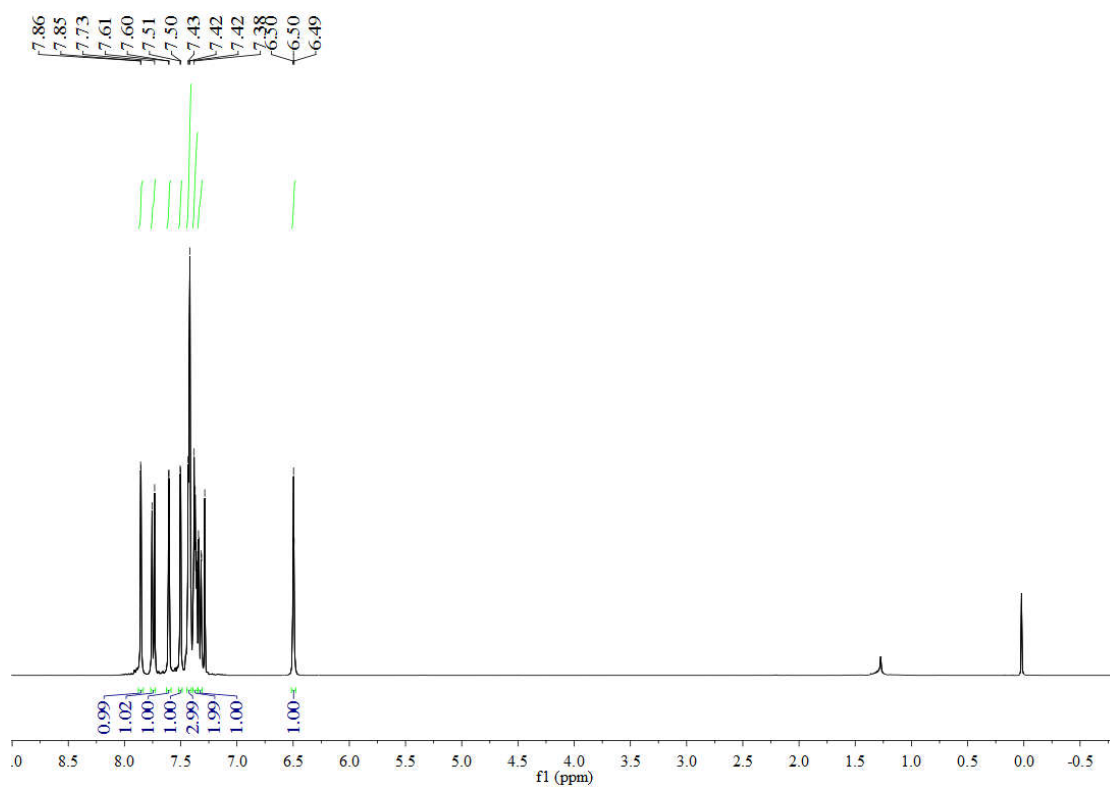

4as <sup>13</sup>C NMR

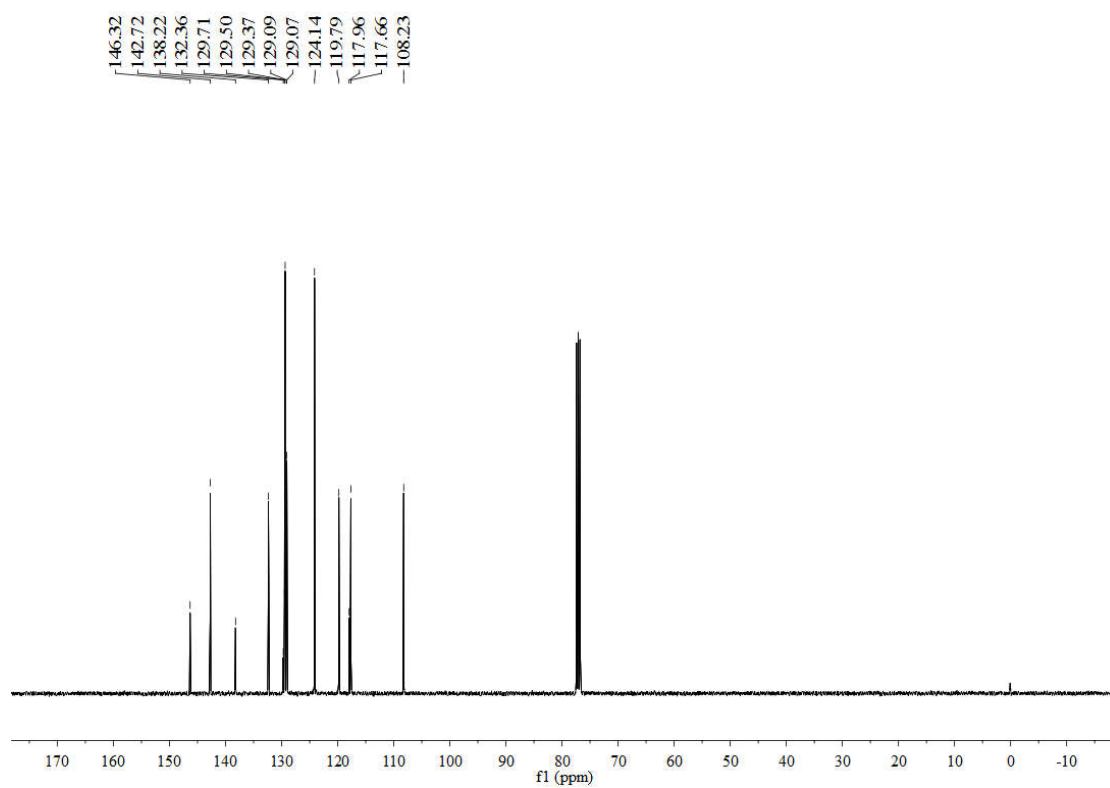

4at <sup>1</sup>H NMR

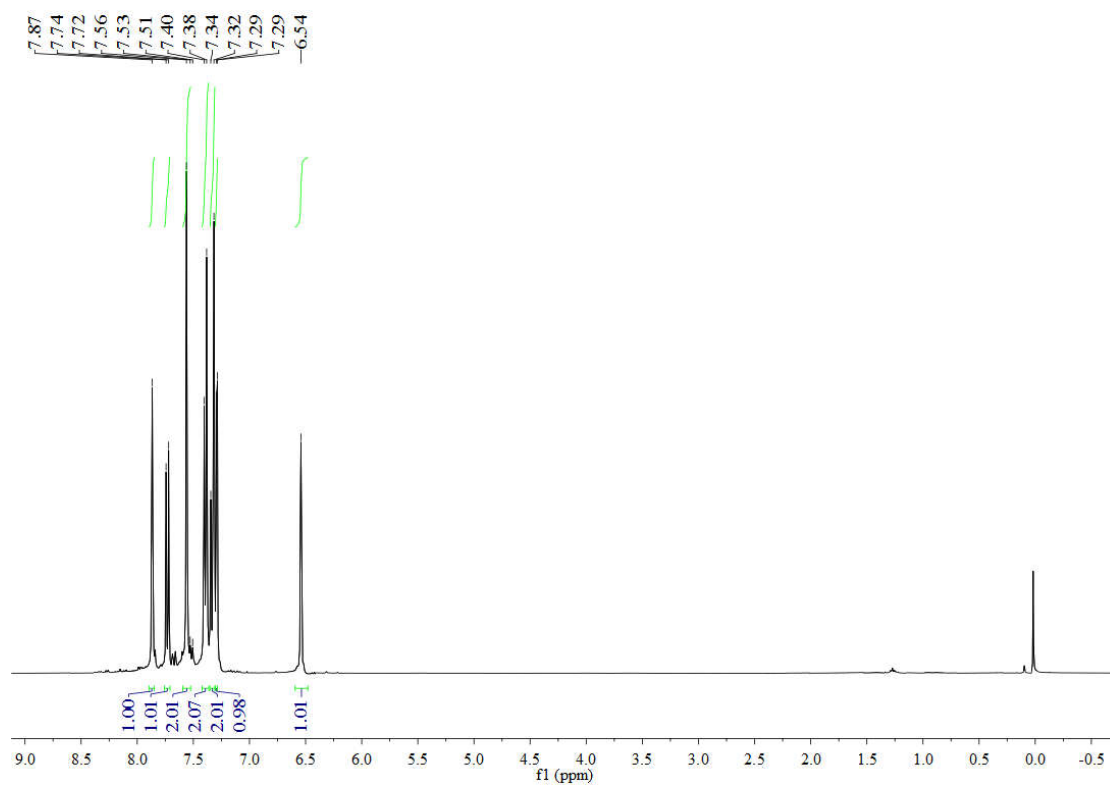

4at <sup>13</sup>C NMR

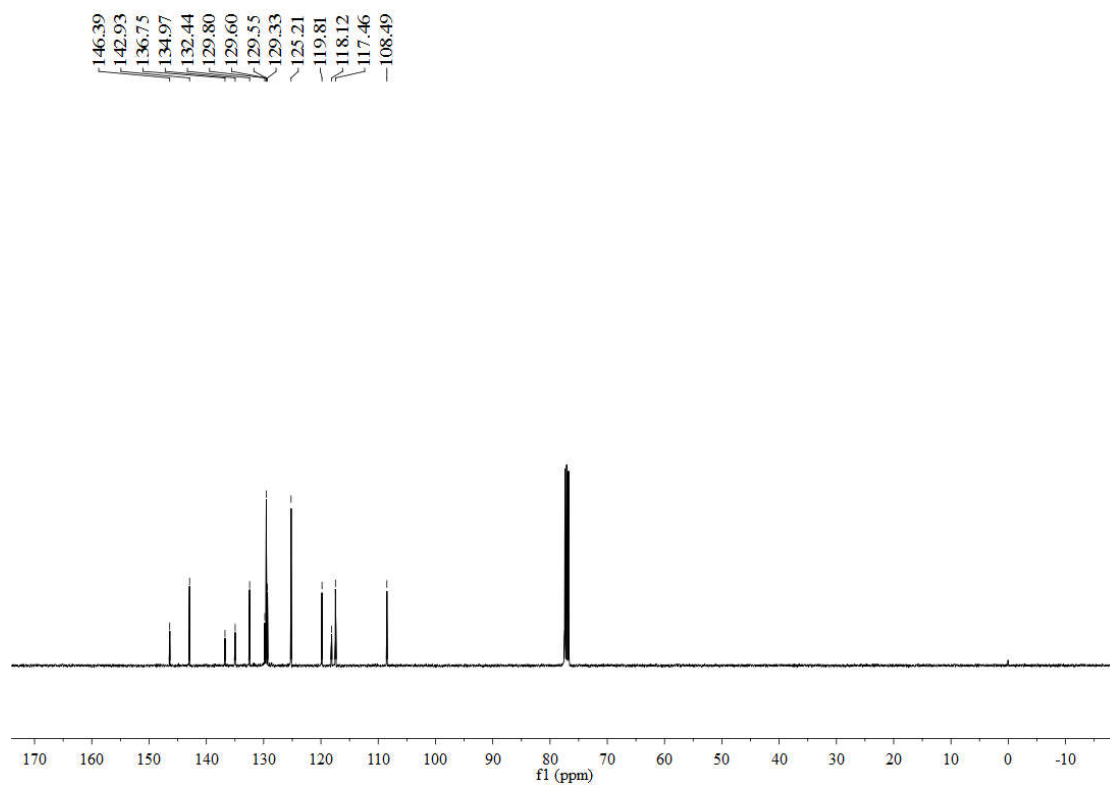



4au <sup>1</sup>H NMR

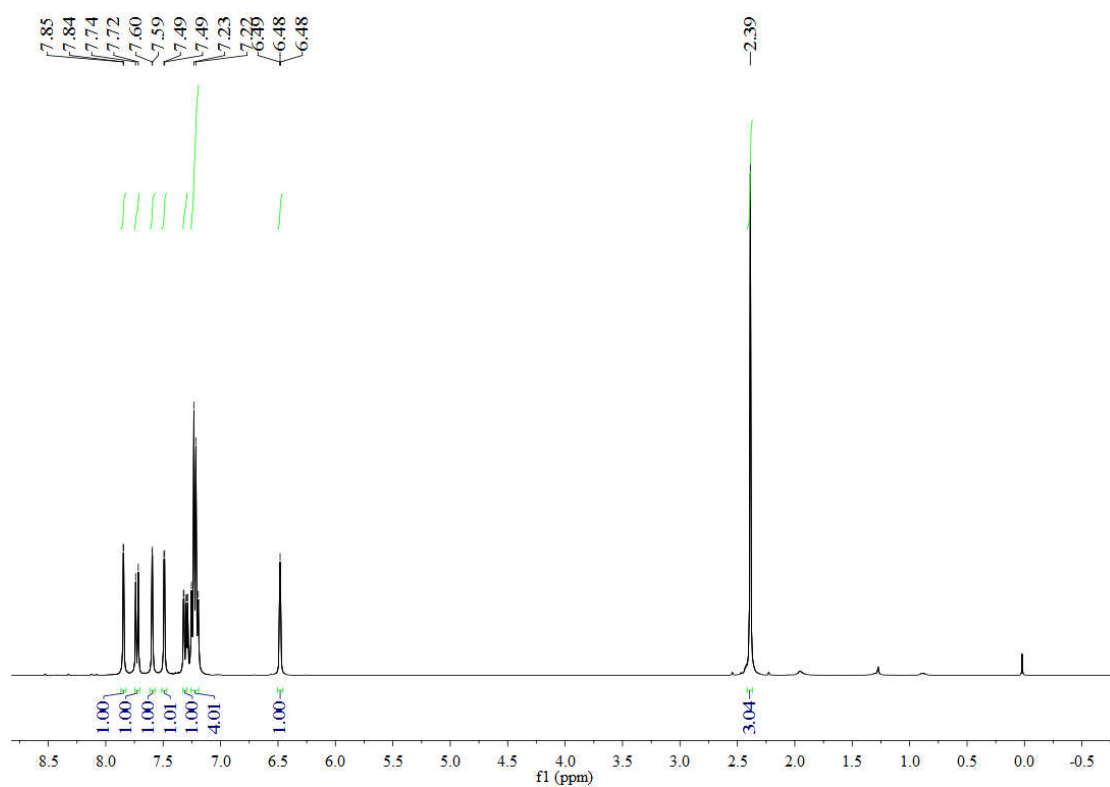

4au <sup>13</sup>C NMR

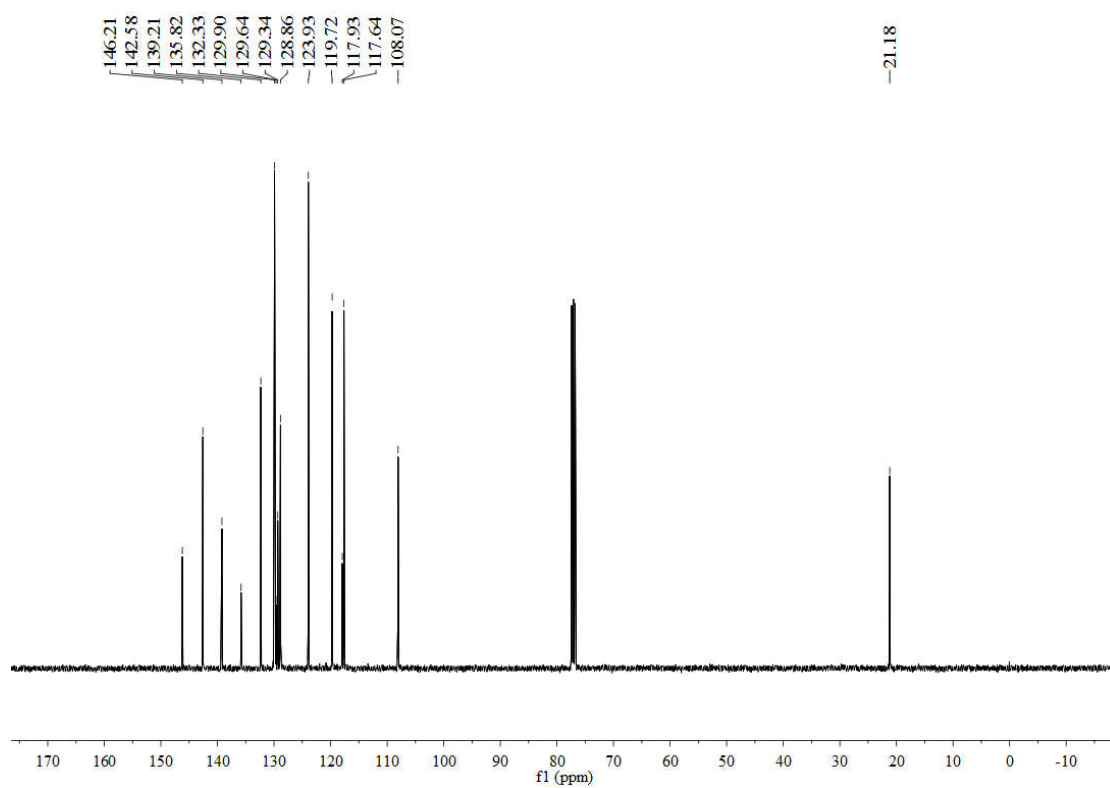

4av <sup>1</sup>H NMR

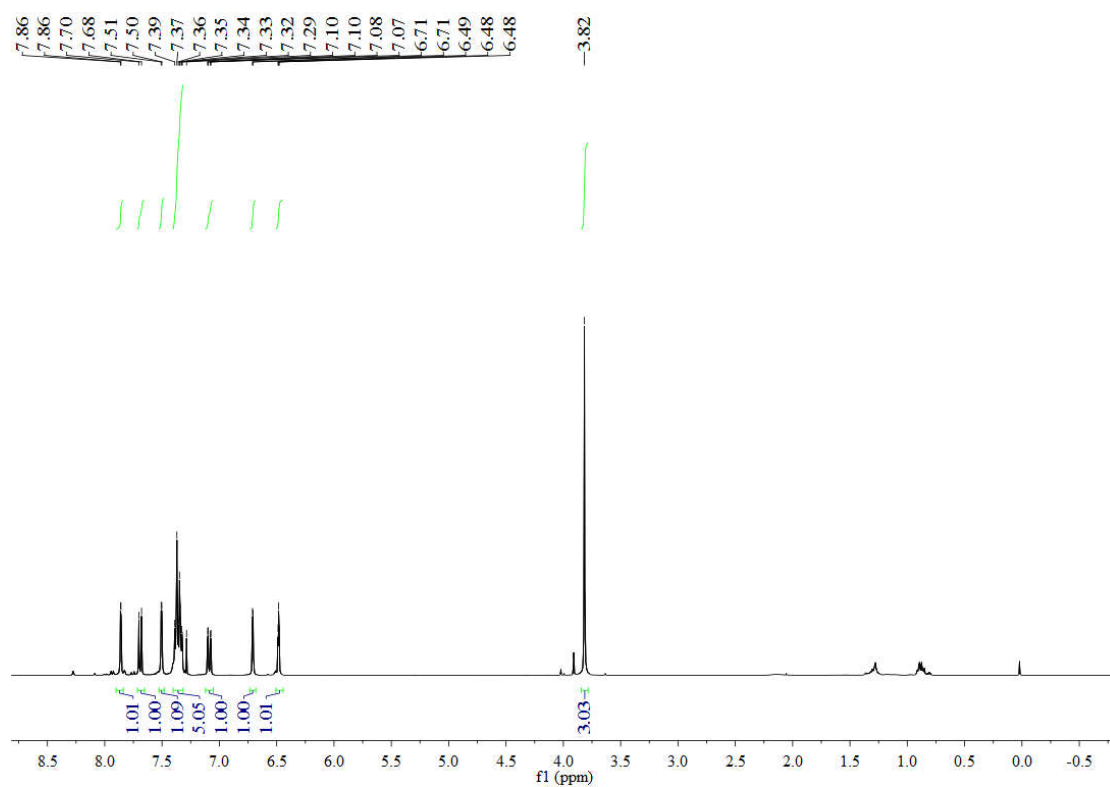

4av <sup>13</sup>C NMR

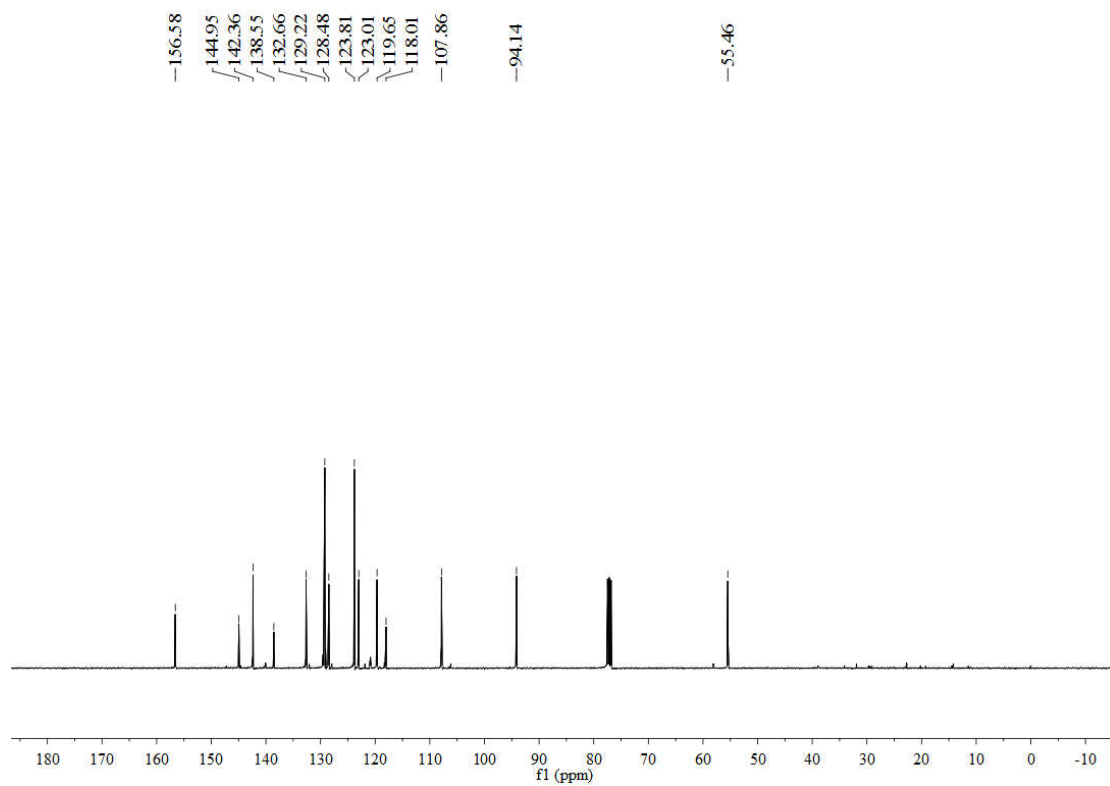

4aw <sup>1</sup>H NMR

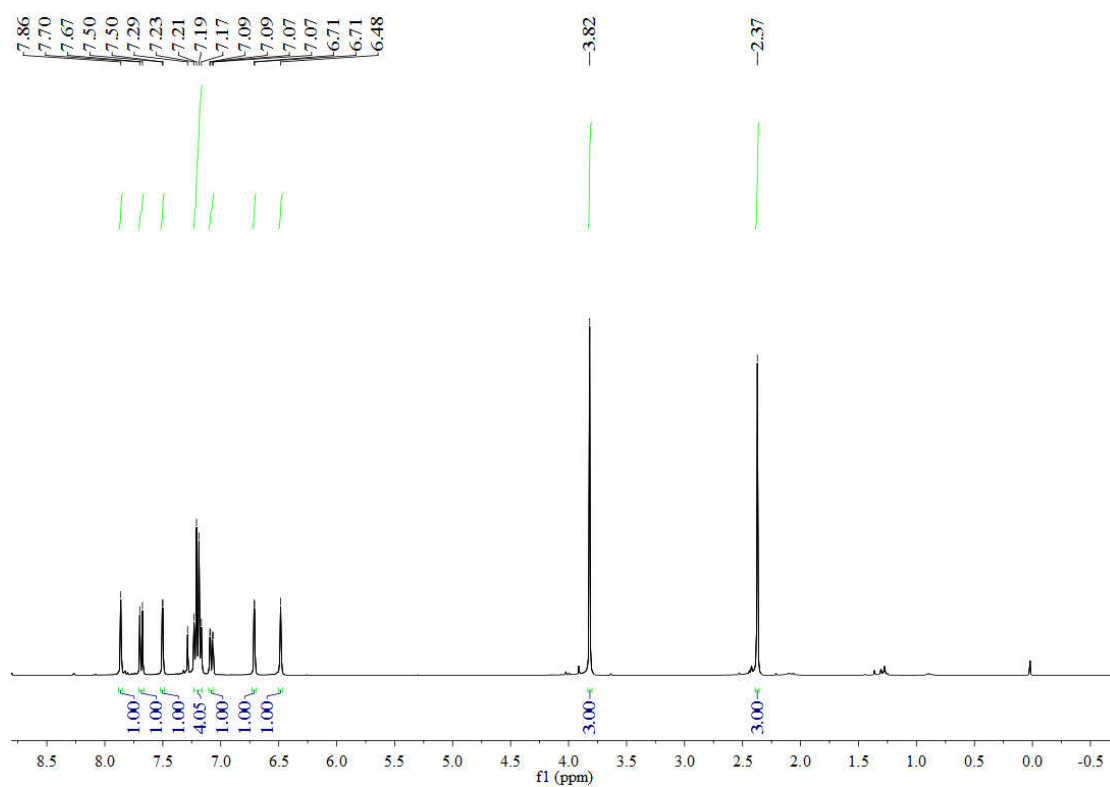

4aw <sup>13</sup>C NMR

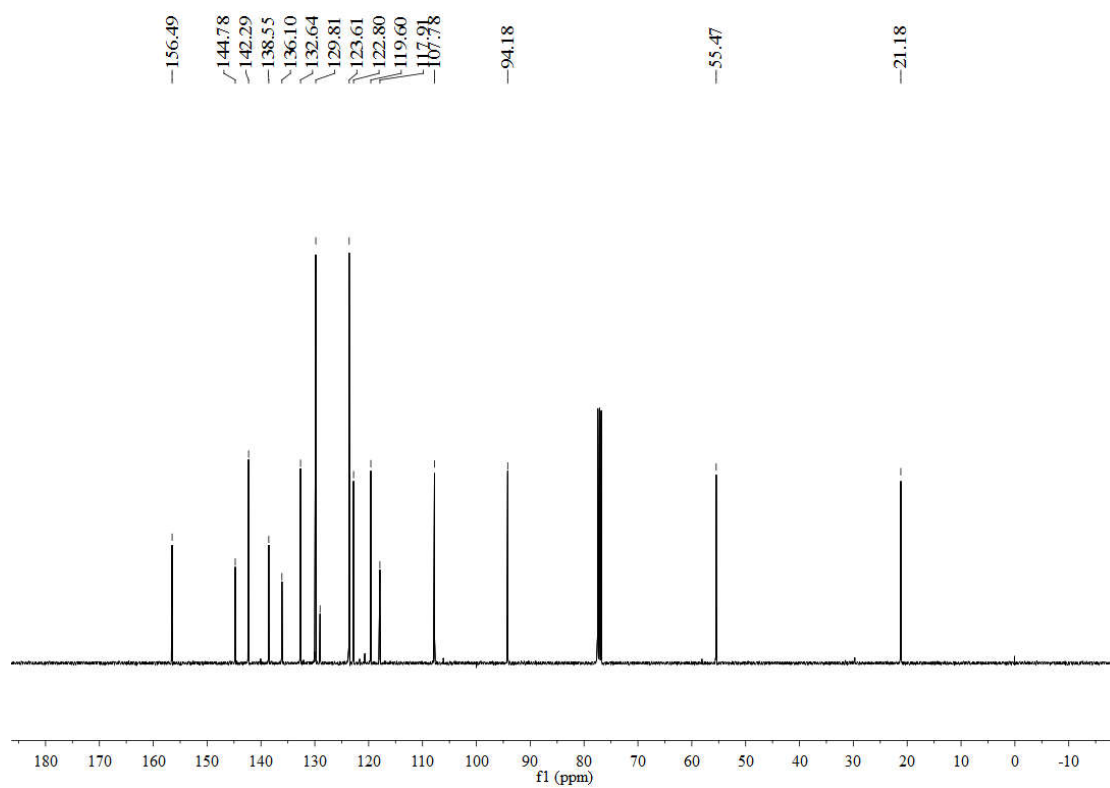

4ax <sup>1</sup>H NMR

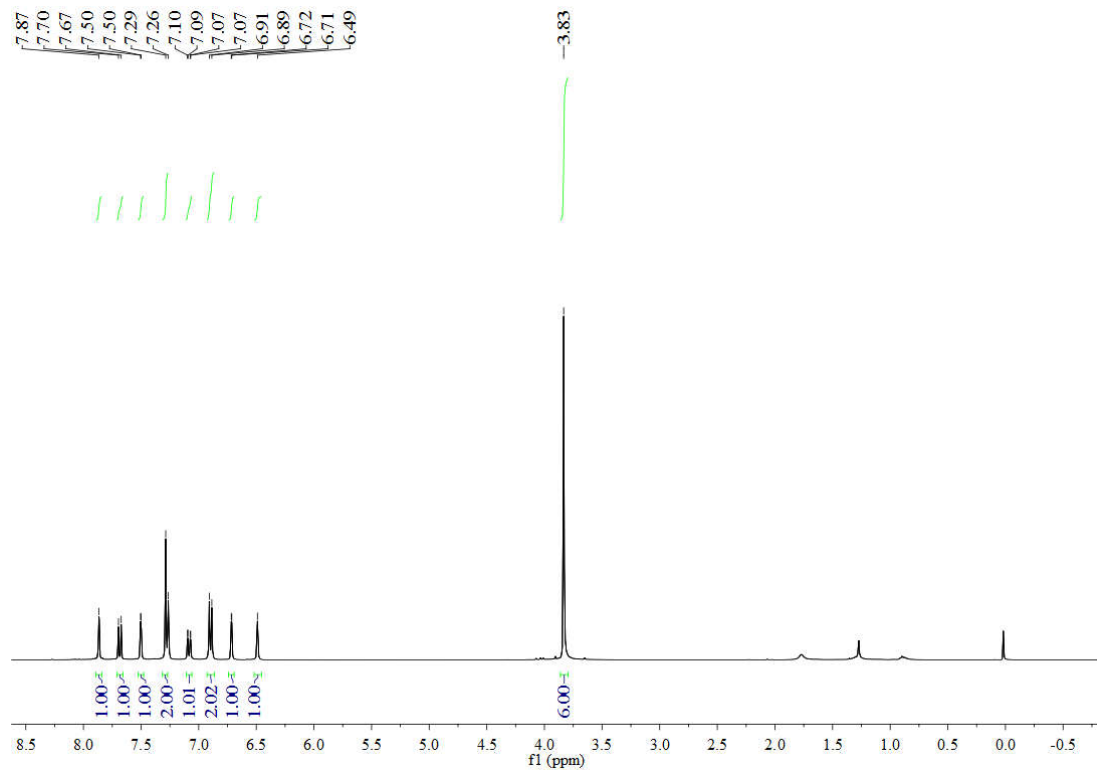

4ax <sup>13</sup>C NMR

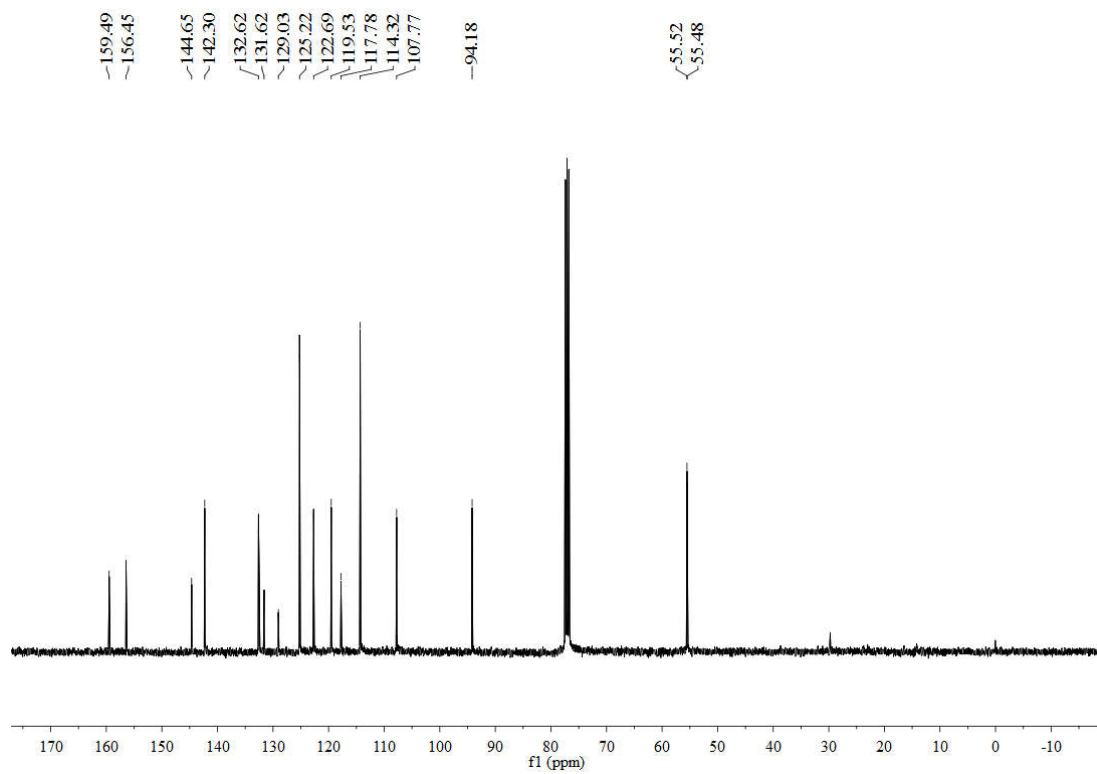

4bb <sup>1</sup>H NMR

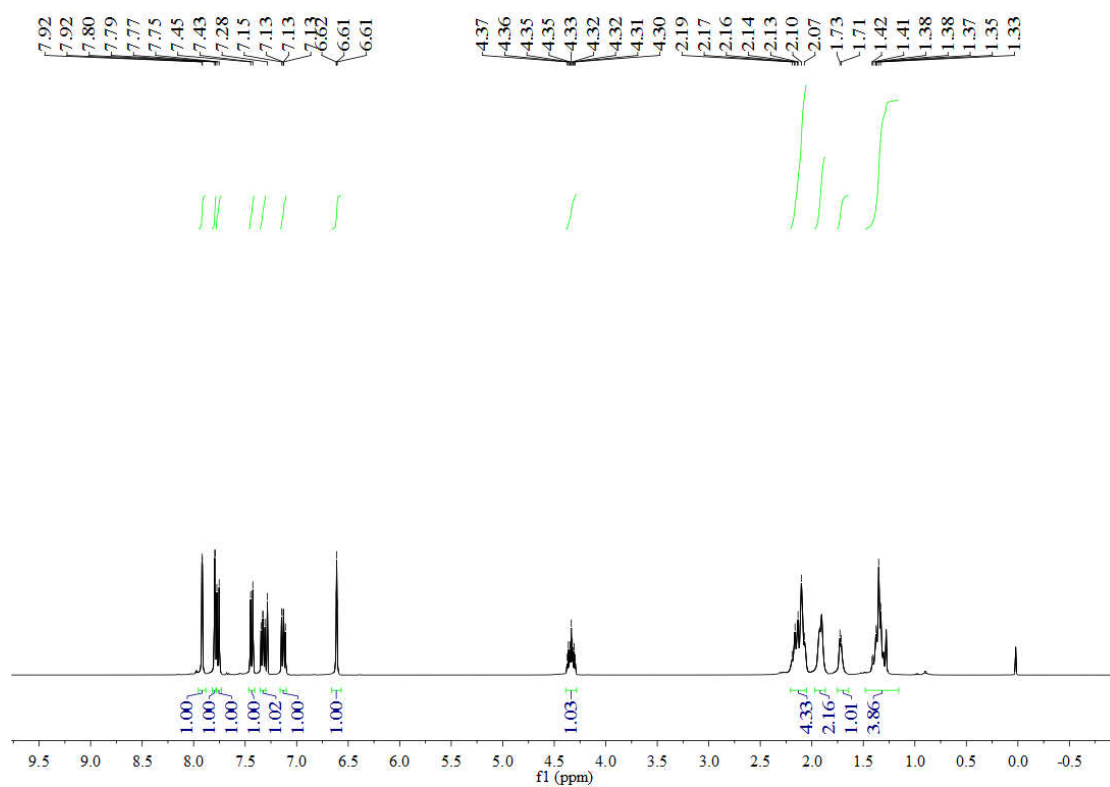

4bb <sup>13</sup>C NMR

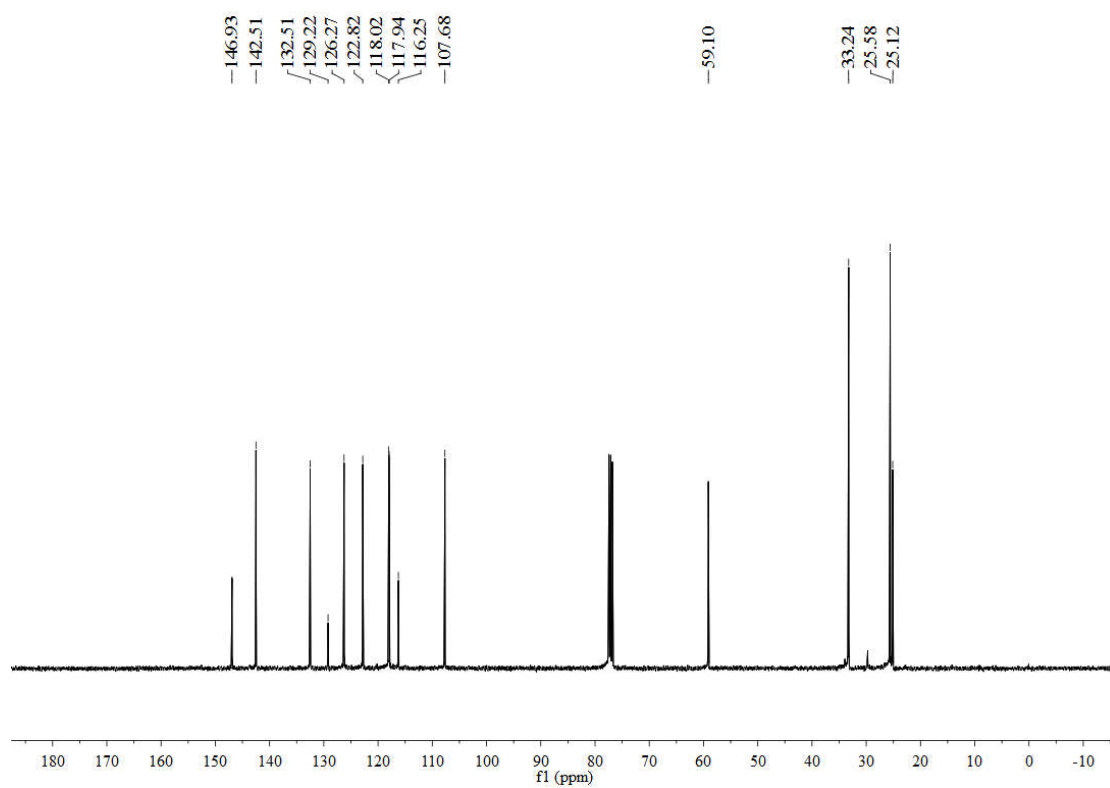

Supplement: d0ob02485f1.pdf [file d0ob02485f1.pdf]
